# Supplementary material for: Smartphone usage and its associated behaviours among undergraduate medical students in Pakistan
Source: Research Square preprint supplement (doi:10.21203/rs.3.rs-3928350/v1), 2024-04-15
Supplement: Supplementary file 1 [file 782cfa7db0f587d294c6d297.xlsx]

## Sheet: Main working 
	Your class
														ANOVA TEST
		Strongly agree	Agree	Neutral	Disagree	Strongly disagree		Weighted Average per item	Standard Deviation		Total Mean of theme	Standard Deviation		F-Statistic	P-Value				Analysis of Variance (ANOVA) Results: The study investigated the impact of smartphone usage on various themes, with a focus on Daily-Life Disturbance, Overuse, Withdrawal, Cyberspace Oriented Relations, and Tolerance. ANOVA tests were conducted to examine whether there are significant differences in the means across these themes. 1. Daily-Life Disturbance: - The ANOVA test for the theme "Daily-Li…
Daily-Life Disturbance	Missing planned work due to smartphone use	34	106	40	56	28	264	3.24	1.42		3,28	1.53	Daily-Life Disturbance	3.07	0.092
	Having a hard time concentrating in class, while doing assignments, or while working due to smartphone use	20	78	44	94	28	264	3.21	1.61
	Using my smartphone longer than I had intended	28	136	48	36	16	264	3.38	1.56
Overuse	Feeling pain in the wrists or at the back of the neck while using a smartphone	10	84	42	30	94	260	2.53	1.41		3.07	0.59	Overuse	1.75	0.19
	Experiencing lightheadedness or blurred vision due to excessive smartphone use	16	98	48	74	28	264	3.18	1.52
	Feeling tired and lacking adequate sleep due to excessive smartphone use	24	100	50	58	32	264	3.08	1.51
	Having tried time and again to shorten my smartphone use time, but failing all the time	20	92	68	70	14	264	2.76	1.61
	Always thinking that I should shorten my smartphone use time	46	136	46	26	10	264	3.91	1.41
	The people around me tell me that I use my smartphone too much	12	60	42	124	26	264	2.54	1.51
Withdrawl	Won’t be able to stand not having a smartphone	16	78	42	94	34	264	3.06	1.5		3.2	0.56	Withdrawl	1.71	0.196
	Feeling impatient and fretful when I am not holding my smartphone	6	70	40	120	28	264	3.18	1.5
	Having my smartphone in my hand even when I am not using it	16	90	54	70	34	264	3.37	1,47
	I will never give up using my smartphone even when my daily life is already greatly affected by it.	10	46	26	144	38	264	3.08	1.49
	Bringing my smartphone to the toilet even when I am in a hurry to get there.	2	24	16	112	110	264	2.68	1.6
Cyberspace oreinted relations	Not being able to use my smartphone would be as painful as losing a friend.	14	52	36	112	50	264	2.76	1.58		3.34	0.53	Cyberspace oreinted relations	4.27	0.026
	Feeling great meeting more people via smartphone use	46	78	52	64	24	264	3.64	1.49
	Feeling that my relationships with my smartphone buddies are more intimate than my relationships with my real-life friends	42	30	40	104	48	264	3.27	1.57
	Constantly checking my smartphone so as not to miss conversations between other people on Twitter or Facebook	10	76	60	62	56	264	3.08	1.51								In this table, the F-Statistic represents the test statistic from the ANOVA test, and the P-Value is the probability associated with the test statistic. If the p-value is less than the chosen significance level (commonly 0.05), you would reject the null hypothesis, indicating significant differences in the means.
	Feeling that my smartphone buddies understand me better than my real-life friends	6	30	38	138	52	264	3.53	1.48
	Preferring talking with my smartphone buddies to hanging out with my real-life friends or with the other members of my family	4	38	46	132	44	264	3.34	1.47
	Not being able to use my smartphone would be as painful as losing a friend.	6	52	32	110	64	264	2.78	1.62
	Preferring searching from my smartphone to asking other people	16	122	52	48	26	264	3.55	1.44
Tolerance	My fully charged battery does not last for one whole day.	14	48	46	106	50	264	3.19	1.49		3.18	0.57	Tolerance	1.44	0.249
	Feeling the urge to use my smartphone again right after I stopped using it	14	88	82	70	10	264	3.08	1.48
	Getting irritated when bothered while using my smartphone	20	92	76	56	20	264	3.27	1.51
		Female	Male	t-statistic	p-value
	Information storage	36	10	0.241	0.814
	Communication	30	8	0.631	0.541
	Communication, Information storage, Entertainment ( movies , music), Games, Education	28	20	-0.238	0.815
	Education	26	2	1.214	0.24
	Communication, Information storage, Entertainment ( movies , music), Education	22	12	-0.648	0.52
	Communication, Entertainment ( movies , music), Education	12	6	-0.434	0.67
	Communication, Information storage, Education	8	2	1.18	0.258
	Communication, Information storage	6	8	-1.395	0.189
	Communication, Information storage, Entertainment ( movies , music), Games, Education, Any other	4	8	-1.048	0.302
	Communication, Information storage, Games, Education	2	2	0	1
	Entertainment ( movies , music), Games, Education	2	2	0	1
	Entertainment ( movies , music)	2	2	0	1
	Entertainment ( movies , music), Any other, shopping	2	2	0	1

## Sheet: Form responses 1
MBBS Year	Gender	Select the follwoing ways you use mobile	Missing planned work due to smartphone use	Having a hard time concentrating in class, while doing assignments, or while working due to smartphone use	Using my smartphone longer than I had intended	Feeling pain in the wrists or at the back of the neck while using a smartphone	Experiencing lightheadedness or blurred vision due to excessive smartphone use	Feeling tired and lacking adequate sleep due to excessive smartphone use	Having tried time and again to shorten my smartphone use time, but failing all the time	Always thinking that I should shorten my smartphone use time	The people around me tell me that I use my smartphone too much	Won’t be able to stand not having a smartphone	Feeling impatient and fretful when I am not holding my smartphone	Having my smartphone in my hand even when I am not using it	I will never give up using my smartphone even when my daily life is already greatly affected by it.	Bringing my smartphone to the toilet even when I am in a hurry to get there.	Not being able to use my smartphone would be as painful as losing a friend.	Feeling great meeting more people via smartphone use	Feeling that my relationships with my smartphone buddies are more intimate than my relationships with my real-life friends	Constantly checking my smartphone so as not to miss conversations between other people on Twitter or Facebook	Feeling that my smartphone buddies understand me better than my real-life friends	Preferring talking with my smartphone buddies to hanging out with my real-life friends or with the other members of my family	Not being able to use my smartphone would be as painful as losing a friend.	Preferring searching from my smartphone to asking other people	My fully charged battery does not last for one whole day.	Feeling the urge to use my smartphone again right after I stopped using it	Getting irritated when bothered while using my smartphone
5	Male	Communication, Information storage, Entertainment ( movies , music), Games, Education, Any other	Agree	Agree	Agree	Neutral	Agree	Agree	Agree	Agree	Agree	Neutral	Agree	Agree	Agree	Agree	Agree	Agree	Agree	Agree	Agree	Agree	Agree	Agree	Agree	Agree	Agree
5	Female	Communication, Information storage, Entertainment ( movies , music), Education	Strongly agree	Disagree	Neutral	Agree	Agree	Disagree	Disagree	Agree	Disagree	Disagree	Disagree	Agree	Disagree	Disagree	Disagree	Agree	Disagree	Agree	Agree	Agree	Disagree	Agree	Disagree	Disagree	Disagree
5	Female	Entertainment ( movies , music)	Neutral	Strongly disagree	Strongly disagree	Neutral	Neutral	Strongly disagree	Neutral	Neutral	Neutral	Neutral	Neutral	Strongly disagree	Agree	Agree	Strongly disagree	Neutral	Neutral	Neutral	Neutral	Neutral	Strongly disagree	Neutral	Strongly disagree	Neutral	Neutral
5	Male	Communication, Information storage, Entertainment ( movies , music), Games, Education	Strongly disagree	Strongly disagree	Neutral	Agree	Agree	Agree	Disagree	Disagree	Disagree	Disagree	Disagree	Strongly disagree	Strongly disagree	Disagree	Strongly disagree	Agree	Strongly disagree	Strongly disagree	Strongly disagree	Strongly disagree	Strongly disagree	Neutral	Strongly disagree	Disagree	Neutral
5	Male	Communication, Information storage, Entertainment ( movies , music), Games, Education, Any other	Strongly agree	Agree	Strongly agree	Disagree	Strongly disagree	Strongly agree	Neutral	Neutral	Agree	Strongly agree	Agree	Agree	Agree	Strongly disagree	Disagree	Disagree	Strongly disagree	Strongly disagree	Strongly disagree	Strongly disagree	Disagree	Neutral	Disagree	Neutral	Neutral
5	Male	Entertainment ( movies , music)	Neutral	Neutral	Agree	Disagree	Neutral	Disagree	Disagree	Neutral	Neutral	Neutral	Neutral	Neutral	Neutral	Neutral	Neutral	Agree	Neutral	Neutral	Neutral	Agree	Neutral	Neutral	Neutral	Neutral	Neutral
5	Female	Education	Strongly agree	Neutral	Strongly agree	Agree	Agree	Strongly agree	Strongly agree	Strongly agree	Strongly agree	Disagree	Disagree	Neutral	Agree	Strongly disagree	Strongly disagree	Agree	Disagree	Disagree	Disagree	Disagree	Strongly disagree	Agree	Strongly agree	Strongly agree	Strongly agree
5	Female	Entertainment ( movies , music), Games, Education	Disagree	Strongly disagree	Agree	Agree	Agree	Agree	Agree	Agree	Disagree	Disagree	Strongly disagree	Strongly disagree	Strongly disagree	Strongly disagree	Strongly disagree	Strongly disagree	Strongly disagree	Strongly disagree	Disagree	Strongly disagree	Strongly disagree	Strongly disagree	Neutral	Neutral	Agree
5	Female	Communication, Information storage, Entertainment ( movies , music), Games, Education	Agree	Disagree	Agree	Disagree	Agree	Agree	Disagree	Agree	Neutral	Agree	Neutral	Disagree	Disagree	Disagree	Disagree	Agree	Neutral	Neutral	Disagree	Disagree	Disagree	Neutral	Disagree	Neutral	Disagree
5	Female	Communication, Information storage, Entertainment ( movies , music), Education	Disagree	Disagree	Agree	Agree	Agree	Disagree	Disagree	Agree	Disagree	Disagree	Disagree	Agree	Disagree	Disagree	Disagree	Agree	Disagree	Agree	Disagree	Disagree	Disagree	Agree	Agree	Agree	Disagree
5	Male	Entertainment ( movies , music)	Agree	Agree	Agree	Disagree	Disagree	Agree	Neutral	Neutral	Neutral	Agree	Neutral	Agree	Agree	Neutral	Neutral	Neutral	Neutral	Neutral	Strongly agree	Neutral	Neutral	Neutral	Strongly agree	Agree	Strongly agree
5	Female	Communication	Agree	Agree	Agree	Neutral	Strongly agree	Strongly agree	Agree	Strongly agree	Neutral	Agree	Agree	Disagree	Agree	Disagree	Agree	Agree	Agree	Neutral	Neutral	Agree	Disagree	Agree	Disagree	Agree	Agree
5	Female	Communication, Information storage, Entertainment ( movies , music), Education	Agree	Strongly agree	Strongly agree	Disagree	Agree	Strongly agree	Strongly agree	Strongly agree	Disagree	Agree	Disagree	Disagree	Disagree	Strongly disagree	Disagree	Agree	Disagree	Strongly disagree	Disagree	Disagree	Disagree	Agree	Strongly disagree	Disagree	Agree
5	Female	Communication, Information storage, Games, Education	Neutral	Strongly disagree	Neutral	Disagree	Neutral	Disagree	Disagree	Neutral	Strongly disagree	Strongly disagree	Disagree	Strongly disagree	Disagree	Strongly disagree	Strongly disagree	Neutral	Strongly disagree	Strongly disagree	Strongly disagree	Strongly disagree	Strongly disagree	Neutral	Disagree	Disagree	Neutral
5	Female	Communication, Information storage, Entertainment ( movies , music), Games, Education	Agree	Disagree	Agree	Agree	Agree	Agree	Agree	Agree	Agree	Disagree	Agree	Agree	Disagree	Disagree	Agree	Disagree	Disagree	Agree	Disagree	Disagree	Agree	Agree	Disagree	Agree	Agree
5	Female	Communication, Information storage, Entertainment ( movies , music), Games, Education	Agree	Neutral	Agree	Neutral	Agree	Neutral	Neutral	Agree	Agree	Strongly agree	Disagree	Disagree	Disagree	Disagree	Neutral	Agree	Neutral	Disagree	Disagree	Disagree	Disagree	Neutral	Neutral	Disagree	Neutral
5	Female	Communication, Entertainment ( movies , music), Education	Agree	Disagree	Agree	Neutral	Disagree	Agree	Agree	Agree	Disagree	Disagree	Disagree	Agree	Neutral	Agree	Disagree	Disagree	Disagree	Strongly disagree	Disagree	Disagree	Disagree	Agree	Disagree	Neutral	Agree
5	Female	Communication, Entertainment ( movies , music), Education	Agree	Disagree	Agree	Neutral	Disagree	Agree	Agree	Agree	Disagree	Disagree	Disagree	Neutral	Neutral	Strongly disagree	Disagree	Strongly agree	Disagree	Neutral	Disagree	Disagree	Strongly disagree	Agree	Strongly agree	Neutral	Agree
5	Female	Communication	Agree	Agree	Agree	Agree	Disagree	Agree	Neutral	Agree	Disagree	Agree	Agree	Agree	Disagree	Disagree	Agree	Agree	Disagree	Disagree	Disagree	Disagree	Agree	Agree	Disagree	Agree	Neutral
5	Female	Communication	Disagree	Disagree	Agree	Strongly disagree	Agree	Agree	Strongly disagree	Agree	Disagree	Disagree	Disagree	Agree	Disagree	Strongly disagree	Disagree	Agree	Disagree	Agree	Disagree	Disagree	Disagree	Agree	Disagree	Disagree	Disagree
5	Female	Information storage	Strongly agree	Disagree	Agree	Strongly agree	Strongly agree	Strongly agree	Strongly agree	Agree	Agree	Agree	Disagree	Agree	Agree	Agree	Strongly agree	Agree	Neutral	Disagree	Disagree	Agree	Agree	Agree	Agree	Agree	Strongly agree
5	Male	Communication, Information storage, Entertainment ( movies , music), Games, Education	Strongly agree	Strongly agree	Strongly agree	Agree	Strongly agree	Strongly agree	Strongly agree	Strongly agree	Disagree	Neutral	Strongly agree	Strongly agree	Strongly agree	Neutral	Strongly agree	Strongly agree	Strongly agree	Strongly agree	Agree	Neutral	Strongly agree	Strongly agree	Disagree	Strongly agree	Strongly agree
5	Female	Communication, Information storage, Education	Agree	Strongly disagree	Agree	Strongly agree	Agree	Strongly agree	Agree	Strongly agree	Disagree	Disagree	Neutral	Strongly agree	Strongly agree	Disagree	Agree	Agree	Disagree	Neutral	Disagree	Disagree	Agree	Agree	Disagree	Agree	Agree
5	Female	Communication	Neutral	Disagree	Agree	Disagree	Agree	Strongly disagree	Neutral	Agree	Neutral	Agree	Agree	Agree	Disagree	Disagree	Neutral	Agree	Disagree	Agree	Disagree	Neutral	Agree	Neutral	Neutral	Disagree	Disagree
5	Female	Communication, Information storage, Entertainment ( movies , music), Games, Education	Agree	Neutral	Agree	Neutral	Agree	Agree	Agree	Strongly agree	Neutral	Neutral	Agree	Neutral	Neutral	Strongly disagree	Agree	Agree	Neutral	Agree	Disagree	Disagree	Neutral	Agree	Neutral	Neutral	Agree
4	Male	Communication	Disagree	Disagree	Agree	Disagree	Disagree	Agree	Agree	Agree	Neutral	Strongly agree	Agree	Disagree	Disagree	Disagree	Agree	Agree	Strongly disagree	Agree	Strongly disagree	Strongly disagree	Agree	Agree	Disagree	Agree	Disagree
4	Female	Communication, Information storage, Entertainment ( movies , music), Education	Agree	Disagree	Agree	Strongly disagree	Disagree	Agree	Agree	Neutral	Disagree	Neutral	Agree	Agree	Disagree	Strongly disagree	Strongly disagree	Agree	Strongly agree	Disagree	Neutral	Neutral	Disagree	Strongly agree	Strongly disagree	Agree	Agree
4	Male	Communication	Agree	Neutral	Agree	Neutral	Neutral	Neutral	Neutral	Neutral	Neutral	Agree	Neutral	Neutral	Neutral	Agree	Neutral	Agree	Agree	Disagree	Neutral	Disagree	Disagree	Agree	Agree	Agree	Neutral
4	Male	Communication,	Strongly agree	Neutral	Agree	Agree	Agree	Agree	Strongly agree	Strongly agree	Agree	Neutral	Neutral	Disagree	Agree	Strongly disagree	Agree	Agree	Agree	Neutral	Disagree	Disagree	Disagree	Neutral	Disagree	Agree	Agree
4	Female	Communication, Information storage, Entertainment ( movies , music), Education	Strongly agree	Agree	Strongly agree	Strongly agree	Agree	Agree	Disagree	Agree	Disagree	Neutral	Agree	Agree	Strongly disagree	Disagree	Disagree	Agree	Disagree	Disagree	Disagree	Disagree	Disagree	Agree	Disagree	Disagree	Disagree
4	Male	Communication	Neutral	Strongly disagree	Disagree	Strongly disagree	Disagree	Strongly disagree	Disagree	Strongly agree	Strongly disagree	Strongly disagree	Strongly disagree	Strongly agree	Strongly disagree	Strongly disagree	Neutral	Agree	Neutral	Neutral	Strongly disagree	Neutral	Agree	Strongly disagree	Strongly disagree	Disagree	Agree
4	Female	Education	Strongly agree	Strongly agree	Strongly agree	Agree	Strongly agree	Strongly agree	Strongly agree	Strongly agree	Strongly agree	Disagree	Neutral	Neutral	Strongly agree	Strongly disagree	Strongly disagree	Disagree	Disagree	Disagree	Disagree	Disagree	Strongly disagree	Neutral	Strongly agree	Strongly agree	Strongly agree
4	Female	Communication, Information storage, Entertainment ( movies , music), Education	Agree	Agree	Neutral	Strongly agree	Strongly agree	Disagree	Neutral	Strongly agree	Disagree	Disagree	Disagree	Neutral	Strongly disagree	Strongly disagree	Strongly disagree	Agree	Strongly agree	Disagree	Strongly agree	Agree	Strongly disagree	Strongly disagree	Disagree	Agree	Neutral
4	Female	Information storage	Disagree	Agree	Disagree	Disagree	Disagree	Disagree	Agree	Agree	Disagree	Disagree	Disagree	Agree	Disagree	Disagree	Disagree	Agree	Disagree	Agree	Disagree	Disagree	Disagree	Agree	Agree	Agree	Disagree
4	Female	Education	Neutral	Disagree	Agree	Agree	Agree	Neutral	Agree	Disagree	Disagree	Disagree	Disagree	Neutral	Disagree	Disagree	Disagree	Agree	Disagree	Neutral	Disagree	Disagree	Neutral	Disagree	Agree	Neutral	Agree
4	Male	Information storage	Strongly disagree	Disagree	Agree	Disagree	Disagree	Agree	Disagree	Disagree	Agree	Agree	Agree	Disagree	Disagree	Disagree	Strongly disagree	Strongly agree	Agree	Strongly disagree	Neutral	Neutral	Strongly disagree	Disagree	Strongly agree	Neutral	Strongly disagree
4	Female	Communication	Agree	Disagree	Neutral	Neutral	Disagree	Neutral	Neutral	Neutral	Disagree	Neutral	Disagree	Agree	Disagree	Disagree	Neutral	Neutral	Disagree	Neutral	Neutral	Neutral	Neutral	Agree	Neutral	Neutral	Neutral
4	Male	Communication, Information storage, Entertainment ( movies , music), Education	Disagree	Disagree	Strongly disagree	Strongly disagree	Strongly disagree	Strongly disagree	Disagree	Neutral	Disagree	Disagree	Disagree	Neutral	Disagree	Disagree	Neutral	Agree	Disagree	Agree	Disagree	Disagree	Disagree	Disagree	Disagree	Disagree	Disagree
4	Male	Entertainment ( movies , music)	Strongly disagree	Strongly disagree	Neutral	Agree	Agree	Strongly agree	Neutral	Disagree	Agree	Agree	Agree	Strongly disagree	Disagree	Disagree	Agree	Strongly disagree	Strongly disagree	Neutral	Strongly disagree	Agree	Strongly disagree	Agree	Strongly disagree	Agree	Disagree
4	Male	Communication, Information storage, Entertainment ( movies , music), Games, Education	Agree	Disagree	Agree	Agree	Disagree	Disagree	Agree	Agree	Disagree	Disagree	Disagree	Agree	Disagree	Disagree	Agree	Agree	Disagree	Agree	Disagree	Disagree	Disagree	Disagree	Disagree	Agree	Neutral
4	Female	Communication	Agree	Neutral	Neutral	Disagree	Neutral	Neutral	Strongly agree	Agree	Disagree	Neutral	Neutral	Strongly disagree	Strongly disagree	Strongly disagree	Neutral	Agree	Neutral	Neutral	Disagree	Neutral	Disagree	Neutral	Strongly disagree	Disagree	Neutral
1	Male	Communication, Information storage, Entertainment ( movies , music), Education	Disagree	Disagree	Disagree	Strongly disagree	Disagree	Strongly disagree	Disagree	Neutral	Disagree	Strongly disagree	Disagree	Disagree	Disagree	Disagree	Strongly disagree	Disagree	Disagree	Disagree	Disagree	Disagree	Disagree	Disagree	Neutral	Disagree	Disagree
1	Female	Communication, Information storage, Entertainment ( movies , music), Games, Education	Agree	Agree	Agree	Neutral	Agree	Agree	Neutral	Agree	Neutral	Disagree	Disagree	Disagree	Strongly disagree	Strongly disagree	Strongly disagree	Disagree	Disagree	Disagree	Disagree	Neutral	Strongly disagree	Neutral	Disagree	Neutral	Disagree
1	Female	Communication, Entertainment ( movies , music), Education	Disagree	Disagree	Agree	Disagree	Neutral	Neutral	Agree	Agree	Neutral	Agree	Agree	Disagree	Agree	Agree	Disagree	Disagree	Disagree	Agree	Agree	Disagree	Disagree	Agree	Strongly disagree	Neutral	Disagree
1	Female	Information storage	Disagree	Agree	Agree	Disagree	Disagree	Disagree	Agree	Agree	Disagree	Disagree	Disagree	Agree	Disagree	Disagree	Disagree	Agree	Disagree	Agree	Disagree	Disagree	Disagree	Agree	Agree	Agree	Disagree
1	Female	Information storage	Agree	Neutral	Agree	Agree	Neutral	Agree	Agree	Agree	Agree	Agree	Disagree	Disagree	Disagree	Strongly disagree	Neutral	Neutral	Neutral	Agree	Disagree	Neutral	Agree	Agree	Agree	Neutral	Agree
1	Female	Communication, Information storage, Entertainment ( movies , music), Games, Education	Neutral	Disagree	Agree	Disagree	Disagree	Neutral	Disagree	Agree	Disagree	Strongly agree	Agree	Agree	Disagree	Strongly disagree	Disagree	Neutral	Neutral	Agree	Agree	Neutral	Disagree	Neutral	Disagree	Disagree	Neutral
1	Female	Information storage	Agree	Neutral	Agree	Neutral	Neutral	Agree	Neutral	Agree	Agree	Agree	Neutral	Disagree	Disagree	Strongly disagree	Disagree	Neutral	Neutral	Neutral	Disagree	Disagree	Neutral	Disagree	Agree	Agree	Agree
1	Female	Communication, Information storage, Entertainment ( movies , music), Education	Agree	Agree	Neutral	Disagree	Neutral	Agree	Disagree	Agree	Strongly disagree	Strongly disagree	Strongly disagree	Neutral	Strongly agree	Strongly disagree	Strongly disagree	Agree	Agree	Agree	Neutral	Neutral	Agree	Disagree	Disagree	Disagree	Agree
1	Female	Information storage	Agree	Agree	Agree	Disagree	Disagree	Disagree	Agree	Agree	Disagree	Disagree	Disagree	Agree	Disagree	Disagree	Agree	Agree	Disagree	Agree	Disagree	Disagree	Agree	Agree	Agree	Agree	Disagree
1	Female	Education	Strongly agree	Strongly agree	Strongly agree	Strongly agree	Strongly agree	Strongly agree	Strongly agree	Strongly agree	Strongly agree	Neutral	Neutral	Disagree	Strongly agree	Strongly disagree	Strongly disagree	Strongly agree	Disagree	Disagree	Disagree	Disagree	Strongly disagree	Disagree	Strongly agree	Strongly agree	Strongly agree
1	Female	Education	Agree	Disagree	Disagree	Disagree	Agree	Disagree	Agree	Agree	Disagree	Agree	Disagree	Agree	Disagree	Disagree	Agree	Agree	Disagree	Disagree	Disagree	Disagree	Disagree	Disagree	Disagree	Disagree	Agree
1	Female	Information storage	Disagree	Agree	Disagree	Disagree	Agree	Neutral	Disagree	Agree	Disagree	Disagree	Disagree	Agree	Disagree	Disagree	Disagree	Strongly agree	Disagree	Disagree	Disagree	Disagree	Disagree	Disagree	Disagree	Disagree	Agree
1	Female	Communication, Information storage	Neutral	Agree	Agree	Agree	Agree	Neutral	Disagree	Agree	Disagree	Disagree	Disagree	Disagree	Disagree	Disagree	Disagree	Agree	Disagree	Neutral	Strongly disagree	Strongly disagree	Disagree	Disagree	Agree	Neutral	Agree
1	Male	Communication, Information storage	Disagree	Neutral	Neutral	Neutral	Agree	Neutral	Neutral	Disagree	Agree	Neutral	Neutral	Neutral	Neutral	Neutral	Neutral	Neutral	Disagree	Agree	Disagree	Neutral	Neutral	Neutral	Neutral	Neutral	Neutral
1	Male	Communication, Information storage, Education, social media	Disagree	Agree	Neutral	Disagree	Strongly disagree	Disagree	Neutral	Agree	Disagree	Agree	Agree	Disagree	Disagree	Agree	Agree	Disagree	Disagree	Disagree	Strongly disagree	Disagree	Agree	Neutral	Disagree	Agree	Neutral
1	Male	Communication, Information storage, Entertainment ( movies , music), Games, Education	Agree	Agree	Agree	Agree	Disagree	Disagree	Agree	Agree	Disagree	Disagree	Disagree	Disagree	Disagree	Disagree	Disagree	Agree	Disagree	Agree	Disagree	Disagree	Disagree	Disagree	Disagree	Agree	Disagree
1	Male	Communication, Information storage, Entertainment ( movies , music), Games, Education	Agree	Disagree	Agree	Disagree	Disagree	Disagree	Agree	Agree	Disagree	Disagree	Disagree	Disagree	Disagree	Disagree	Disagree	Neutral	Disagree	Disagree	Disagree	Disagree	Disagree	Agree	Disagree	Disagree	Neutral
1	Male	Communication, Information storage, Education, Any other	Disagree	Neutral	Disagree	Disagree	Disagree	Disagree	Agree	Agree	Disagree	Agree	Neutral	Disagree	Agree	Agree	Disagree	Disagree	Disagree	Neutral	Disagree	Disagree	Disagree	Disagree	Disagree	Neutral	Neutral
1	Female	Communication	Neutral	Agree	Agree	Agree	Agree	Agree	Agree	Agree	Agree	Agree	Agree	Agree	Agree	Agree	Agree	Neutral	Neutral	Agree	Agree	Strongly agree	Agree	Agree	Agree	Agree	Agree
1	Male	Education	Disagree	Strongly disagree	Disagree	Strongly disagree	Strongly disagree	Strongly disagree	Disagree	Agree	Neutral	Strongly agree	Strongly disagree	Disagree	Disagree	Strongly disagree	Disagree	Strongly disagree	Strongly disagree	Disagree	Strongly disagree	Disagree	Disagree	Strongly disagree	Strongly disagree	Neutral	Neutral
1	Female	Information storage	Neutral	Neutral	Neutral	Agree	Neutral	Disagree	Neutral	Agree	Neutral	Disagree	Disagree	Agree	Disagree	Agree	Disagree	Neutral	Disagree	Neutral	Strongly disagree	Disagree	Strongly disagree	Neutral	Strongly disagree	Neutral	Agree
1	Female	Communication, Information storage, Entertainment ( movies , music), Games, Education	Disagree	Disagree	Neutral	Disagree	Disagree	Neutral	Disagree	Neutral	Disagree	Agree	Agree	Neutral	Disagree	Strongly disagree	Disagree	Neutral	Neutral	Neutral	Neutral	Neutral	Disagree	Neutral	Neutral	Disagree	Neutral
1	Female	Communication, Entertainment ( movies , music), Education	Neutral	Disagree	Agree	Agree	Disagree	Agree	Neutral	Agree	Agree	Strongly disagree	Disagree	Strongly disagree	Disagree	Strongly disagree	Strongly disagree	Agree	Disagree	Disagree	Disagree	Disagree	Strongly disagree	Disagree	Strongly disagree	Disagree	Disagree
1	Male	All of above options	Disagree	Disagree	Neutral	Neutral	Neutral	Neutral	Neutral	Agree	Agree	Neutral	Neutral	Agree	Disagree	Neutral	Disagree	Agree	Disagree	Neutral	Disagree	Disagree	Disagree	Agree	Disagree	Neutral	Neutral
1	Male	Communication, Information storage, Entertainment ( movies , music), Games, Education, Any other	Agree	Neutral	Disagree	Strongly disagree	Disagree	Agree	Neutral	Agree	Agree	Disagree	Disagree	Disagree	Disagree	Disagree	Agree	Agree	Neutral	Disagree	Neutral	Neutral	Agree	Agree	Strongly disagree	Disagree	Agree
1	Male	Communication, Entertainment ( movies , music)	Agree	Disagree	Agree	Agree	Agree	Agree	Agree	Agree	Disagree	Agree	Agree	Neutral	Disagree	Disagree	Disagree	Agree	Disagree	Disagree	Disagree	Disagree	Disagree	Agree	Neutral	Agree	Agree
1	Female	Education	Neutral	Disagree	Agree	Disagree	Agree	Disagree	Disagree	Disagree	Disagree	Disagree	Disagree	Neutral	Disagree	Disagree	Disagree	Disagree	Disagree	Disagree	Disagree	Disagree	Disagree	Agree	Disagree	Disagree	Disagree
1	Male	Entertainment ( movies , music), Games, Any other,	Strongly disagree	Strongly agree	Agree	Agree	Agree	Agree	Agree	Agree	Agree	Agree	Agree	Agree	Strongly disagree	Strongly disagree	Agree	Agree	Agree	Agree	Strongly disagree	Strongly disagree	Agree	Agree	Agree	Agree	Agree
2	Male	Communication, Information storage, Entertainment ( movies , music), Games, Education	Strongly agree	Agree	Disagree	Agree	Agree	Strongly agree	Agree	Neutral	Strongly agree	Strongly disagree	Disagree	Strongly disagree	Neutral	Disagree	Agree	Neutral	Neutral	Neutral	Neutral	Neutral	Neutral	Neutral	Neutral	Neutral	Neutral
2	Female	Communication, Information storage, Entertainment ( movies , music), Games, Education, Any other	Agree	Agree	Strongly agree	Neutral	Disagree	Agree	Disagree	Strongly agree	Disagree	Disagree	Disagree	Agree	Disagree	Strongly disagree	Disagree	Neutral	Disagree	Strongly disagree	Strongly disagree	Strongly disagree	Strongly disagree	Strongly agree	Strongly disagree	Disagree	Agree
2	Female	Communication	Strongly agree	Agree	Agree	Agree	Agree	Agree	Agree	Strongly agree	Agree	Agree	Agree	Agree	Agree	Disagree	Disagree	Agree	Neutral	Agree	Disagree	Agree	Disagree	Agree	Disagree	Neutral	Agree
2	Female	Communication	Strongly agree	Agree	Agree	Agree	Agree	Agree	Agree	Strongly agree	Agree	Agree	Agree	Agree	Agree	Disagree	Disagree	Agree	Neutral	Agree	Neutral	Neutral	Disagree	Agree	Disagree	Neutral	Agree
2	Female	Communication, Information storage	Disagree	Neutral	Agree	Disagree	Disagree	Disagree	Disagree	Agree	Disagree	Disagree	Disagree	Agree	Disagree	Strongly disagree	Disagree	Disagree	Disagree	Disagree	Disagree	Disagree	Strongly disagree	Agree	Neutral	Disagree	Disagree
1	Female	Education	Agree	Agree	Neutral	Agree	Agree	Agree	Neutral	Agree	Neutral	Agree	Strongly agree	Strongly agree	Strongly disagree	Strongly disagree	Neutral	Strongly agree	Neutral	Strongly agree	Agree	Neutral	Agree	Strongly agree	Disagree	Agree	Strongly agree
1	Female	Entertainment ( movies , music), Any other, shopping	Agree	Disagree	Neutral	Agree	Strongly disagree	Disagree	Disagree	Agree	Disagree	Agree	Disagree	Disagree	Agree	Strongly disagree	Agree	Neutral	Strongly disagree	Disagree	Disagree	Disagree	Neutral	Strongly agree	Strongly disagree	Disagree	Neutral
1	Male	Information storage	Disagree	Neutral	Disagree	Strongly disagree	Disagree	Strongly disagree	Agree	Agree	Agree	Disagree	Agree	Neutral	Agree	Disagree	Strongly agree	Agree	Agree	Neutral	Disagree	Strongly agree	Neutral	Agree	Disagree	Strongly agree	Agree
1	Female	Communication, Information storage, Entertainment ( movies , music), Games, Education	Agree	Strongly disagree	Strongly agree	Disagree	Neutral	Neutral	Disagree	Neutral	Disagree	Strongly disagree	Strongly disagree	Disagree	Disagree	Strongly disagree	Strongly disagree	Agree	Strongly disagree	Strongly disagree	Strongly disagree	Strongly disagree	Disagree	Disagree	Agree	Agree	Neutral
1	Female	Communication, Information storage, Education	Disagree	Disagree	Agree	Agree	Agree	Agree	Agree	Agree	Disagree	Strongly disagree	Neutral	Strongly agree	Agree	Neutral	Neutral	Agree	Disagree	Disagree	Disagree	Disagree	Agree	Agree	Agree	Neutral	Agree
1	Female	Communication	Disagree	Disagree	Disagree	Disagree	Disagree	Disagree	Disagree	Disagree	Disagree	Disagree	Disagree	Disagree	Disagree	Disagree	Disagree	Disagree	Strongly disagree	Strongly disagree	Strongly disagree	Strongly disagree	Strongly disagree	Strongly disagree	Strongly disagree	Agree	Strongly disagree
1	Male	Entertainment ( movies , music)	Strongly disagree	Agree	Strongly disagree	Agree	Agree	Disagree	Neutral	Neutral	Neutral	Disagree	Strongly disagree	Agree	Disagree	Disagree	Disagree	Agree	Strongly agree	Disagree	Agree	Neutral	Strongly disagree	Neutral	Neutral	Neutral	Agree
1	Female	Communication, Information storage, Entertainment ( movies , music), Education	Agree	Strongly agree	Agree	Disagree	Disagree	Agree	Strongly agree	Strongly agree	Strongly disagree	Agree	Disagree	Disagree	Disagree	Strongly disagree	Disagree	Disagree	Disagree	Strongly disagree	Disagree	Disagree	Disagree	Agree	Strongly disagree	Disagree	Strongly agree
1	Female	Communication, Entertainment ( movies , music), Education	Disagree	Disagree	Agree	Agree	Agree	Agree	Disagree	Agree	Disagree	Disagree	Disagree	Agree	Disagree	Disagree	Disagree	Agree	Disagree	Disagree	Disagree	Disagree	Disagree	Agree	Agree	Disagree	Agree
1	Female	Communication, Information storage, Entertainment ( movies , music), Education	Agree	Disagree	Agree	Agree	Agree	Disagree	Neutral	Agree	Disagree	Neutral	Disagree	Agree	Disagree	Disagree	Disagree	Agree	Disagree	Disagree	Disagree	Disagree	Disagree	Agree	Disagree	Disagree	Agree
1	Female	Communication, Entertainment ( movies , music), Education	Neutral	Disagree	Agree	Disagree	Agree	Strongly disagree	Neutral	Agree	Disagree	Agree	Agree	Agree	Disagree	Disagree	Strongly agree	Neutral	Disagree	Disagree	Disagree	Disagree	Agree	Agree	Disagree	Agree	Agree
1	Female	Communication, Information storage, Entertainment ( movies , music), Games, Education	Agree	Disagree	Agree	Disagree	Disagree	Neutral	Neutral	Agree	Neutral	Agree	Disagree	Agree	Neutral	Strongly disagree	Strongly disagree	Agree	Neutral	Neutral	Agree	Strongly disagree	Strongly disagree	Disagree	Neutral	Neutral	Strongly disagree
1	Female	Education	Neutral	Agree	Neutral	Strongly disagree	Disagree	Disagree	Disagree	Neutral	Neutral	Disagree	Disagree	Disagree	Strongly disagree	Strongly disagree	Disagree	Agree	Strongly disagree	Strongly disagree	Strongly disagree	Disagree	Disagree	Disagree	Strongly disagree	Disagree	Neutral
3	Female	Communication, Information storage, Entertainment ( movies , music), Games, Education	Agree	Disagree	Agree	Agree	Agree	Agree	Agree	Agree	Disagree	Agree	Agree	Agree	Disagree	Disagree	Agree	Disagree	Disagree	Agree	Disagree	Disagree	Agree	Agree	Disagree	Agree	Agree
3	Female	Information storage	Strongly disagree	Neutral	Neutral	Neutral	Neutral	Agree	Neutral	Neutral	Neutral	Neutral	Neutral	Disagree	Disagree	Disagree	Neutral	Agree	Agree	Strongly agree	Agree	Disagree	Disagree	Disagree	Disagree	Neutral	Neutral
3	Female	Information storage	Strongly disagree	Strongly disagree	Strongly disagree	Strongly disagree	Strongly disagree	Strongly disagree	Strongly disagree	Strongly disagree	Strongly disagree	Strongly disagree	Strongly disagree	Strongly disagree	Strongly disagree	Strongly disagree	Strongly disagree	Strongly disagree	Strongly disagree	Strongly disagree	Disagree	Strongly disagree	Disagree	Strongly disagree	Strongly disagree	Disagree	Disagree
3	Male	Communication, Information storage, Entertainment ( movies , music), Games, Education	Agree	Disagree	Agree	Disagree	Disagree	Neutral	Agree	Agree	Disagree	Disagree	Disagree	Disagree	Disagree	Disagree	Disagree	Neutral	Disagree	Agree	Disagree	Disagree	Disagree	Agree	Disagree	Agree	Neutral
3	Female	Education	Disagree	Disagree	Neutral	Agree	Disagree	Disagree	Disagree	Agree	Disagree	Disagree	Disagree	Disagree	Disagree	Strongly disagree	Strongly disagree	Strongly disagree	Strongly disagree	Strongly disagree	Strongly disagree	Strongly disagree	Strongly disagree	Strongly disagree	Strongly disagree	Agree	Agree
3	Female	Information storage	Agree	Agree	Disagree	Disagree	Agree	Agree	Neutral	Agree	Neutral	Disagree	Strongly disagree	Disagree	Disagree	Strongly disagree	Neutral	Neutral	Agree	Agree	Neutral	Disagree	Neutral	Agree	Disagree	Agree	Neutral
3	Female	Communication, Information storage, Entertainment ( movies , music), Games, Education	Agree	Agree	Agree	Agree	Agree	Agree	Agree	Agree	Agree	Agree	Agree	Agree	Disagree	Disagree	Agree	Disagree	Disagree	Agree	Disagree	Disagree	Agree	Agree	Disagree	Agree	Agree
3	Male	Communication, Information storage, Entertainment ( movies , music), Education	Agree	Neutral	Agree	Agree	Agree	Agree	Agree	Strongly agree	Disagree	Neutral	Disagree	Disagree	Disagree	Disagree	Disagree	Agree	Disagree	Neutral	Neutral	Neutral	Disagree	Disagree	Disagree	Neutral	Strongly agree
3	Female	Communication	Agree	Disagree	Agree	Disagree	Agree	Disagree	Neutral	Agree	Agree	Disagree	Agree	Agree	Agree	Strongly disagree	Disagree	Agree	Disagree	Agree	Disagree	Strongly disagree	Disagree	Agree	Neutral	Disagree	Agree
3	Female	Communication, Information storage, Entertainment ( movies , music), Games, Education	Agree	Agree	Agree	Agree	Agree	Agree	Agree	Agree	Agree	Agree	Agree	Agree	Disagree	Disagree	Agree	Agree	Disagree	Agree	Disagree	Disagree	Agree	Agree	Disagree	Agree	Agree
3	Female	Information storage	Neutral	Disagree	Agree	Agree	Neutral	Agree	Disagree	Strongly agree	Disagree	Neutral	Neutral	Neutral	Disagree	Disagree	Disagree	Agree	Agree	Agree	Disagree	Disagree	Neutral	Agree	Neutral	Neutral	Disagree
3	Male	Information storage	Strongly disagree	Agree	Agree	Agree	Agree	Agree	Agree	Strongly agree	Strongly agree	Strongly agree	Strongly disagree	Strongly agree	Neutral	Agree	Strongly agree	Strongly disagree	Strongly agree	Agree	Agree	Neutral	Agree	Agree	Strongly disagree	Strongly agree	Strongly disagree
3	Female	Information storage	Disagree	Neutral	Neutral	Disagree	Disagree	Agree	Agree	Strongly agree	Neutral	Disagree	Disagree	Strongly disagree	Disagree	Strongly disagree	Neutral	Neutral	Disagree	Agree	Agree	Neutral	Agree	Agree	Disagree	Agree	Neutral
3	Female	Communication	Agree	Agree	Agree	Agree	Agree	Agree	Agree	Agree	Agree	Agree	Agree	Agree	Agree	Agree	Agree	Agree	Agree	Agree	Agree	Agree	Neutral	Neutral	Disagree	Agree	Agree
3	Female	Education	Disagree	Disagree	Disagree	Neutral	Neutral	Neutral	Neutral	Disagree	Disagree	Agree	Neutral	Agree	Disagree	Disagree	Disagree	Neutral	Disagree	Agree	Disagree	Disagree	Disagree	Neutral	Agree	Neutral	Neutral
3	Female	Communication	Agree	Disagree	Agree	Disagree	Agree	Agree	Agree	Agree	Agree	Agree	Agree	Agree	Agree	Disagree	Agree	Agree	Agree	Disagree	Agree	Agree	Agree	Agree	Disagree	Agree	Disagree
3	Female	Education	Agree	Disagree	Neutral	Disagree	Neutral	Neutral	Neutral	Neutral	Disagree	Agree	Disagree	Neutral	Disagree	Strongly disagree	Disagree	Neutral	Disagree	Neutral	Disagree	Neutral	Disagree	Disagree	Agree	Neutral	Neutral
3	Female	Information storage	Strongly disagree	Strongly disagree	Strongly disagree	Strongly disagree	Strongly disagree	Strongly disagree	Strongly disagree	Strongly disagree	Strongly disagree	Strongly disagree	Disagree	Disagree	Disagree	Disagree	Disagree	Disagree	Disagree	Disagree	Disagree	Disagree	Disagree	Disagree	Disagree	Disagree	Disagree
3	Female	Education	Disagree	Neutral	Neutral	Disagree	Disagree	Disagree	Neutral	Neutral	Disagree	Neutral	Disagree	Neutral	Disagree	Strongly disagree	Disagree	Neutral	Neutral	Neutral	Disagree	Disagree	Disagree	Disagree	Agree	Neutral	Neutral
3	Female	Information storage	Strongly disagree	Strongly disagree	Strongly disagree	Strongly disagree	Strongly disagree	Strongly disagree	Strongly disagree	Strongly disagree	Strongly disagree	Strongly disagree	Strongly disagree	Strongly disagree	Strongly disagree	Strongly disagree	Strongly disagree	Strongly disagree	Strongly disagree	Strongly disagree	Strongly disagree	Strongly disagree	Strongly disagree	Strongly disagree	Strongly disagree	Strongly disagree	Strongly disagree
3	Male	Communication, Information storage, Entertainment ( movies , music), Games, Education, Any other	Agree	Disagree	Agree	Disagree	Neutral	Neutral	Agree	Agree	Disagree	Disagree	Disagree	Neutral	Disagree	Disagree	Disagree	Disagree	Disagree	Neutral	Disagree	Disagree	Disagree	Disagree	Disagree	Agree	Disagree
3	Female	Communication, Information storage, Entertainment ( movies , music), Games, Education	Agree	Disagree	Strongly agree	Disagree	Neutral	Neutral	Neutral	Neutral	Disagree	Neutral	Disagree	Disagree	Strongly disagree	Strongly disagree	Strongly disagree	Strongly disagree	Strongly disagree	Strongly disagree	Strongly disagree	Strongly disagree	Strongly disagree	Disagree	Disagree	Neutral	Disagree
3	Female	Information storage	Neutral	Neutral	Agree	Neutral	Neutral	Neutral	Neutral	Agree	Agree	Neutral	Neutral	Agree	Agree	Neutral	Agree	Agree	Neutral	Neutral	Neutral	Neutral	Agree	Agree	Agree	Agree	Agree
3	Female	Information storage	Agree	Agree	Neutral	Neutral	Neutral	Agree	Agree	Agree	Strongly disagree	Strongly disagree	Disagree	Strongly disagree	Disagree	Strongly disagree	Neutral	Agree	Strongly disagree	Neutral	Strongly disagree	Strongly disagree	Neutral	Agree	Disagree	Agree	Neutral
2	Male	Communication, Information storage, Entertainment ( movies , music), Education	Strongly agree	Strongly agree	Strongly agree	Disagree	Strongly agree	Neutral	Strongly agree	Disagree	Strongly disagree	Strongly agree	Strongly agree	Strongly agree	Neutral	Strongly agree	Strongly agree	Strongly agree	Strongly agree	Strongly disagree	Agree	Disagree	Strongly agree	Strongly agree	Strongly agree	Strongly agree	Strongly agree
2	Male	Information storage	Strongly disagree	Strongly disagree	Strongly disagree	Strongly disagree	Strongly disagree	Strongly disagree	Strongly disagree	Strongly disagree	Strongly disagree	Strongly disagree	Strongly disagree	Strongly disagree	Strongly disagree	Strongly disagree	Strongly disagree	Strongly disagree	Strongly disagree	Strongly disagree	Strongly disagree	Strongly disagree	Strongly disagree	Strongly disagree	Strongly disagree	Strongly disagree	Strongly disagree
2	Male	Information storage	Strongly disagree	Strongly disagree	Strongly disagree	Strongly disagree	Strongly disagree	Strongly disagree	Strongly disagree	Strongly disagree	Strongly disagree	Strongly disagree	Strongly disagree	Strongly disagree	Strongly disagree	Strongly disagree	Strongly disagree	Strongly disagree	Strongly disagree	Strongly disagree	Strongly disagree	Strongly disagree	Strongly disagree	Strongly disagree	Strongly disagree	Strongly disagree	Strongly disagree
2	Female	Communication, Information storage, Education	Agree	Disagree	Disagree	Agree	Strongly agree	Neutral	Neutral	Agree	Strongly disagree	Neutral	Agree	Disagree	Strongly disagree	Strongly disagree	Agree	Agree	Disagree	Agree	Disagree	Disagree	Neutral	Agree	Agree	Neutral	Neutral
2	Male	Communication, Information storage, Entertainment ( movies , music), Education	Agree	Agree	Agree	Disagree	Strongly disagree	Strongly disagree	Agree	Agree	Disagree	Strongly disagree	Disagree	Neutral	Neutral	Strongly disagree	Strongly disagree	Agree	Agree	Strongly disagree	Agree	Strongly disagree	Strongly disagree	Neutral	Disagree	Agree	Strongly disagree
4	Male	Communication, Information storage, Entertainment ( movies , music), Education	Agree	Agree	Agree	Neutral	Neutral	Neutral	Neutral	Neutral	Agree	Agree	Agree	Neutral	Agree	Neutral	Agree	Agree	Disagree	Neutral	Disagree	Disagree	Agree	Agree	Neutral	Neutral	Neutral
4	Female	Communication, Information storage, Education	Strongly agree	Agree	Agree	Neutral	Neutral	Neutral	Neutral	Neutral	Neutral	Disagree	Strongly disagree	Strongly disagree	Disagree	Strongly disagree	Disagree	Neutral	Strongly disagree	Strongly disagree	Strongly disagree	Strongly disagree	Strongly disagree	Neutral	Neutral	Neutral	Strongly disagree
4	Male	Communication, Information storage, Entertainment ( movies , music), Games, Education	Disagree	Neutral	Disagree	Disagree	Disagree	Disagree	Disagree	Disagree	Disagree	Disagree	Disagree	Disagree	Disagree	Disagree	Disagree	Disagree	Disagree	Disagree	Disagree	Disagree	Disagree	Strongly agree	Disagree	Disagree	Disagree
4	Male	Communication, Information storage, Entertainment ( movies , music), Games, Education	Neutral	Agree	Strongly agree	Disagree	Neutral	Agree	Agree	Strongly agree	Disagree	Agree	Neutral	Neutral	Disagree	Strongly disagree	Strongly disagree	Neutral	Strongly disagree	Disagree	Strongly disagree	Strongly disagree	Strongly disagree	Agree	Disagree	Agree	Agree
4	Female	Communication, Information storage, Entertainment ( movies , music), Education	Neutral	Disagree	Agree	Disagree	Disagree	Disagree	Disagree	Disagree	Disagree	Strongly agree	Agree	Strongly agree	Strongly disagree	Disagree	Strongly agree	Disagree	Agree	Agree	Neutral	Neutral	Strongly agree	Strongly disagree	Neutral	Agree	Agree
5	Male	Communication	Strongly disagree	Agree	Disagree	Strongly disagree	Strongly disagree	Strongly disagree	Disagree	Agree	Strongly disagree	Strongly disagree	Strongly disagree	Disagree	Strongly disagree	Strongly disagree	Strongly disagree	Agree	Disagree	Agree	Strongly disagree	Strongly disagree	Strongly disagree	Agree	Agree	Strongly disagree	Strongly disagree
2	Female	Communication, Information storage, Entertainment ( movies , music), Education	Neutral	Agree	Neutral	Neutral	Disagree	Neutral	Disagree	Agree	Disagree	Disagree	Disagree	Neutral	Disagree	Strongly disagree	Disagree	Disagree	Neutral	Disagree	Neutral	Disagree	Disagree	Neutral	Disagree	Neutral	Disagree
2	Female	Communication, Information storage, Entertainment ( movies , music), Games, Education	Agree	Disagree	Strongly agree	Disagree	Agree	Agree	Disagree	Disagree	Agree	Disagree	Disagree	Strongly disagree	Neutral	Strongly disagree	Neutral	Strongly disagree	Strongly disagree	Strongly disagree	Strongly disagree	Disagree	Disagree	Agree	Strongly disagree	Neutral	Agree
2	Female	Information storage	Disagree	Disagree	Disagree	Disagree	Neutral	Strongly disagree	Strongly disagree	Neutral	Disagree	Disagree	Disagree	Neutral	Disagree	Strongly disagree	Disagree	Neutral	Disagree	Disagree	Agree	Disagree	Disagree	Agree	Agree	Strongly disagree	Neutral
2	Female	Education	Neutral	Disagree	Agree	Disagree	Agree	Disagree	Disagree	Disagree	Disagree	Disagree	Disagree	Neutral	Disagree	Disagree	Disagree	Disagree	Disagree	Disagree	Disagree	Disagree	Disagree	Agree	Disagree	Disagree	Disagree
2	Male	Entertainment ( movies , music), Games, Any other,	Strongly disagree	Strongly agree	Agree	Agree	Agree	Agree	Agree	Agree	Agree	Agree	Agree	Agree	Strongly disagree	Strongly disagree	Agree	Agree	Agree	Agree	Strongly disagree	Strongly disagree	Agree	Agree	Agree	Agree	Agree
2	Male	Communication, Information storage, Entertainment ( movies , music), Games, Education	Strongly agree	Agree	Disagree	Agree	Agree	Strongly agree	Agree	Neutral	Strongly agree	Strongly disagree	Disagree	Strongly disagree	Neutral	Disagree	Agree	Neutral	Neutral	Neutral	Neutral	Neutral	Neutral	Neutral	Neutral	Neutral	Neutral
2	Female	Communication, Information storage, Entertainment ( movies , music), Games, Education, Any other	Agree	Agree	Strongly agree	Neutral	Disagree	Agree	Disagree	Strongly agree	Disagree	Disagree	Disagree	Agree	Disagree	Strongly disagree	Disagree	Neutral	Disagree	Strongly disagree	Strongly disagree	Strongly disagree	Strongly disagree	Strongly agree	Strongly disagree	Disagree	Agree
2	Female	Communication	Strongly agree	Agree	Agree	Agree	Agree	Agree	Agree	Strongly agree	Agree	Agree	Agree	Agree	Agree	Disagree	Disagree	Agree	Neutral	Agree	Disagree	Agree	Disagree	Agree	Disagree	Neutral	Agree
2	Female	Communication	Strongly agree	Agree	Agree	Agree	Agree	Agree	Agree	Strongly agree	Agree	Agree	Agree	Agree	Agree	Disagree	Disagree	Agree	Neutral	Agree	Neutral	Neutral	Disagree	Agree	Disagree	Neutral	Agree
2	Female	Communication, Information storage	Disagree	Neutral	Agree	Disagree	Disagree	Disagree	Disagree	Agree	Disagree	Disagree	Disagree	Agree	Disagree	Strongly disagree	Disagree	Disagree	Disagree	Disagree	Disagree	Disagree	Strongly disagree	Agree	Neutral	Disagree	Disagree
5	Male	Communication, Information storage, Entertainment ( movies , music), Games, Education, Any other	Agree	Agree	Agree	Neutral	Agree	Agree	Agree	Agree	Agree	Neutral	Agree	Agree	Agree	Agree	Agree	Agree	Agree	Agree	Agree	Agree	Agree	Agree	Agree	Agree	Agree
5	Female	Communication, Information storage, Entertainment ( movies , music), Education	Strongly agree	Disagree	Neutral	Agree	Agree	Disagree	Disagree	Agree	Disagree	Disagree	Disagree	Agree	Disagree	Disagree	Disagree	Agree	Disagree	Agree	Agree	Agree	Disagree	Agree	Disagree	Disagree	Disagree
5	Female	Entertainment ( movies , music)	Neutral	Strongly disagree	Strongly disagree	Neutral	Neutral	Strongly disagree	Neutral	Neutral	Neutral	Neutral	Neutral	Strongly disagree	Agree	Agree	Strongly disagree	Neutral	Neutral	Neutral	Neutral	Neutral	Strongly disagree	Neutral	Strongly disagree	Neutral	Neutral
5	Male	Communication, Information storage, Entertainment ( movies , music), Games, Education	Strongly disagree	Strongly disagree	Neutral	Agree	Agree	Agree	Disagree	Disagree	Disagree	Disagree	Disagree	Strongly disagree	Strongly disagree	Disagree	Strongly disagree	Agree	Strongly disagree	Strongly disagree	Strongly disagree	Strongly disagree	Strongly disagree	Neutral	Strongly disagree	Disagree	Neutral
5	Male	Communication, Information storage, Entertainment ( movies , music), Games, Education, Any other	Strongly agree	Agree	Strongly agree	Disagree	Strongly disagree	Strongly agree	Neutral	Neutral	Agree	Strongly agree	Agree	Agree	Agree	Strongly disagree	Disagree	Disagree	Strongly disagree	Strongly disagree	Strongly disagree	Strongly disagree	Disagree	Neutral	Disagree	Neutral	Neutral
5	Male	Entertainment ( movies , music)	Neutral	Neutral	Agree	Disagree	Neutral	Disagree	Disagree	Neutral	Neutral	Neutral	Neutral	Neutral	Neutral	Neutral	Neutral	Agree	Neutral	Neutral	Neutral	Agree	Neutral	Neutral	Neutral	Neutral	Neutral
5	Female	Education	Strongly agree	Neutral	Strongly agree	Agree	Agree	Strongly agree	Strongly agree	Strongly agree	Strongly agree	Disagree	Disagree	Neutral	Agree	Strongly disagree	Strongly disagree	Agree	Disagree	Disagree	Disagree	Disagree	Strongly disagree	Agree	Strongly agree	Strongly agree	Strongly agree
5	Female	Entertainment ( movies , music), Games, Education	Disagree	Strongly disagree	Agree	Agree	Agree	Agree	Agree	Agree	Disagree	Disagree	Strongly disagree	Strongly disagree	Strongly disagree	Strongly disagree	Strongly disagree	Strongly disagree	Strongly disagree	Strongly disagree	Disagree	Strongly disagree	Strongly disagree	Strongly disagree	Neutral	Neutral	Agree
5	Female	Communication, Information storage, Entertainment ( movies , music), Games, Education	Agree	Disagree	Agree	Disagree	Agree	Agree	Disagree	Agree	Neutral	Agree	Neutral	Disagree	Disagree	Disagree	Disagree	Agree	Neutral	Neutral	Disagree	Disagree	Disagree	Neutral	Disagree	Neutral	Disagree
5	Female	Communication, Information storage, Entertainment ( movies , music), Education	Disagree	Disagree	Agree	Agree	Agree	Disagree	Disagree	Agree	Disagree	Disagree	Disagree	Agree	Disagree	Disagree	Disagree	Agree	Disagree	Agree	Disagree	Disagree	Disagree	Agree	Agree	Agree	Disagree
5	Male	Entertainment ( movies , music)	Agree	Agree	Agree	Disagree	Disagree	Agree	Neutral	Neutral	Neutral	Agree	Neutral	Agree	Agree	Neutral	Neutral	Neutral	Neutral	Neutral	Strongly agree	Neutral	Neutral	Neutral	Strongly agree	Agree	Strongly agree
5	Female	Communication	Agree	Agree	Agree	Neutral	Strongly agree	Strongly agree	Agree	Strongly agree	Neutral	Agree	Agree	Disagree	Agree	Disagree	Agree	Agree	Agree	Neutral	Neutral	Agree	Disagree	Agree	Disagree	Agree	Agree
5	Female	Communication, Information storage, Entertainment ( movies , music), Education	Agree	Strongly agree	Strongly agree	Disagree	Agree	Strongly agree	Strongly agree	Strongly agree	Disagree	Agree	Disagree	Disagree	Disagree	Strongly disagree	Disagree	Agree	Disagree	Strongly disagree	Disagree	Disagree	Disagree	Agree	Strongly disagree	Disagree	Agree
5	Female	Communication, Information storage, Games, Education	Neutral	Strongly disagree	Neutral	Disagree	Neutral	Disagree	Disagree	Neutral	Strongly disagree	Strongly disagree	Disagree	Strongly disagree	Disagree	Strongly disagree	Strongly disagree	Neutral	Strongly disagree	Strongly disagree	Strongly disagree	Strongly disagree	Strongly disagree	Neutral	Disagree	Disagree	Neutral
5	Female	Communication, Information storage, Entertainment ( movies , music), Games, Education	Agree	Disagree	Agree	Agree	Agree	Agree	Agree	Agree	Agree	Disagree	Agree	Agree	Disagree	Disagree	Agree	Disagree	Disagree	Agree	Disagree	Disagree	Agree	Agree	Disagree	Agree	Agree
5	Female	Communication, Information storage, Entertainment ( movies , music), Games, Education	Agree	Neutral	Agree	Neutral	Agree	Neutral	Neutral	Agree	Agree	Strongly agree	Disagree	Disagree	Disagree	Disagree	Neutral	Agree	Neutral	Disagree	Disagree	Disagree	Disagree	Neutral	Neutral	Disagree	Neutral
5	Female	Communication, Entertainment ( movies , music), Education	Agree	Disagree	Agree	Neutral	Disagree	Agree	Agree	Agree	Disagree	Disagree	Disagree	Agree	Neutral	Agree	Disagree	Disagree	Disagree	Strongly disagree	Disagree	Disagree	Disagree	Agree	Disagree	Neutral	Agree
5	Female	Communication, Entertainment ( movies , music), Education	Agree	Disagree	Agree	Neutral	Disagree	Agree	Agree	Agree	Disagree	Disagree	Disagree	Neutral	Neutral	Strongly disagree	Disagree	Strongly agree	Disagree	Neutral	Disagree	Disagree	Strongly disagree	Agree	Strongly agree	Neutral	Agree
5	Female	Communication	Agree	Agree	Agree	Agree	Disagree	Agree	Neutral	Agree	Disagree	Agree	Agree	Agree	Disagree	Disagree	Agree	Agree	Disagree	Disagree	Disagree	Disagree	Agree	Agree	Disagree	Agree	Neutral
5	Female	Communication	Disagree	Disagree	Agree	Strongly disagree	Agree	Agree	Strongly disagree	Agree	Disagree	Disagree	Disagree	Agree	Disagree	Strongly disagree	Disagree	Agree	Disagree	Agree	Disagree	Disagree	Disagree	Agree	Disagree	Disagree	Disagree
5	Female	Information storage	Strongly agree	Disagree	Agree	Strongly agree	Strongly agree	Strongly agree	Strongly agree	Agree	Agree	Agree	Disagree	Agree	Agree	Agree	Strongly agree	Agree	Neutral	Disagree	Disagree	Agree	Agree	Agree	Agree	Agree	Strongly agree
5	Male	Communication, Information storage, Entertainment ( movies , music), Games, Education	Strongly agree	Strongly agree	Strongly agree	Agree	Strongly agree	Strongly agree	Strongly agree	Strongly agree	Disagree	Neutral	Strongly agree	Strongly agree	Strongly agree	Neutral	Strongly agree	Strongly agree	Strongly agree	Strongly agree	Agree	Neutral	Strongly agree	Strongly agree	Disagree	Strongly agree	Strongly agree
5	Female	Communication, Information storage, Education	Agree	Strongly disagree	Agree	Strongly agree	Agree	Strongly agree	Agree	Strongly agree	Disagree	Disagree	Neutral	Strongly agree	Strongly agree	Disagree	Agree	Agree	Disagree	Neutral	Disagree	Disagree	Agree	Agree	Disagree	Agree	Agree
5	Female	Communication	Neutral	Disagree	Agree	Disagree	Agree	Strongly disagree	Neutral	Agree	Neutral	Agree	Agree	Agree	Disagree	Disagree	Neutral	Agree	Disagree	Agree	Disagree	Neutral	Agree	Neutral	Neutral	Disagree	Disagree
5	Female	Communication, Information storage, Entertainment ( movies , music), Games, Education	Agree	Neutral	Agree	Neutral	Agree	Agree	Agree	Strongly agree	Neutral	Neutral	Agree	Neutral	Neutral	Strongly disagree	Agree	Agree	Neutral	Agree	Disagree	Disagree	Neutral	Agree	Neutral	Neutral	Agree
4	Male	Communication	Disagree	Disagree	Agree	Disagree	Disagree	Agree	Agree	Agree	Neutral	Strongly agree	Agree	Disagree	Disagree	Disagree	Agree	Agree	Strongly disagree	Agree	Strongly disagree	Strongly disagree	Agree	Agree	Disagree	Agree	Disagree
4	Female	Communication, Information storage, Entertainment ( movies , music), Education	Agree	Disagree	Agree	Strongly disagree	Disagree	Agree	Agree	Neutral	Disagree	Neutral	Agree	Agree	Disagree	Strongly disagree	Strongly disagree	Agree	Strongly agree	Disagree	Neutral	Neutral	Disagree	Strongly agree	Strongly disagree	Agree	Agree
4	Male	Communication	Agree	Neutral	Agree	Neutral	Neutral	Neutral	Neutral	Neutral	Neutral	Agree	Neutral	Neutral	Neutral	Agree	Neutral	Agree	Agree	Disagree	Neutral	Disagree	Disagree	Agree	Agree	Agree	Neutral
4	Male	Communication,	Strongly agree	Neutral	Agree	Agree	Agree	Agree	Strongly agree	Strongly agree	Agree	Neutral	Neutral	Disagree	Agree	Strongly disagree	Agree	Agree	Agree	Neutral	Disagree	Disagree	Disagree	Neutral	Disagree	Agree	Agree
4	Female	Communication, Information storage, Entertainment ( movies , music), Education	Strongly agree	Agree	Strongly agree	Strongly agree	Agree	Agree	Disagree	Agree	Disagree	Neutral	Agree	Agree	Strongly disagree	Disagree	Disagree	Agree	Disagree	Disagree	Disagree	Disagree	Disagree	Agree	Disagree	Disagree	Disagree
4	Male	Communication	Neutral	Strongly disagree	Disagree	Strongly disagree	Disagree	Strongly disagree	Disagree	Strongly agree	Strongly disagree	Strongly disagree	Strongly disagree	Strongly agree	Strongly disagree	Strongly disagree	Neutral	Agree	Neutral	Neutral	Strongly disagree	Neutral	Agree	Strongly disagree	Strongly disagree	Disagree	Agree
4	Female	Education	Strongly agree	Strongly agree	Strongly agree	Agree	Strongly agree	Strongly agree	Strongly agree	Strongly agree	Strongly agree	Disagree	Neutral	Neutral	Strongly agree	Strongly disagree	Strongly disagree	Disagree	Disagree	Disagree	Disagree	Disagree	Strongly disagree	Neutral	Strongly agree	Strongly agree	Strongly agree
4	Female	Communication, Information storage, Entertainment ( movies , music), Education	Agree	Agree	Neutral	Strongly agree	Strongly agree	Disagree	Neutral	Strongly agree	Disagree	Disagree	Disagree	Neutral	Strongly disagree	Strongly disagree	Strongly disagree	Agree	Strongly agree	Disagree	Strongly agree	Agree	Strongly disagree	Strongly disagree	Disagree	Agree	Neutral
4	Female	Information storage	Disagree	Agree	Disagree	Disagree	Disagree	Disagree	Agree	Agree	Disagree	Disagree	Disagree	Agree	Disagree	Disagree	Disagree	Agree	Disagree	Agree	Disagree	Disagree	Disagree	Agree	Agree	Agree	Disagree
4	Female	Education	Neutral	Disagree	Agree	Agree	Agree	Neutral	Agree	Disagree	Disagree	Disagree	Disagree	Neutral	Disagree	Disagree	Disagree	Agree	Disagree	Neutral	Disagree	Disagree	Neutral	Disagree	Agree	Neutral	Agree
4	Male	Information storage	Strongly disagree	Disagree	Agree	Disagree	Disagree	Agree	Disagree	Disagree	Agree	Agree	Agree	Disagree	Disagree	Disagree	Strongly disagree	Strongly agree	Agree	Strongly disagree	Neutral	Neutral	Strongly disagree	Disagree	Strongly agree	Neutral	Strongly disagree
4	Female	Communication	Agree	Disagree	Neutral	Neutral	Disagree	Neutral	Neutral	Neutral	Disagree	Neutral	Disagree	Agree	Disagree	Disagree	Neutral	Neutral	Disagree	Neutral	Neutral	Neutral	Neutral	Agree	Neutral	Neutral	Neutral
4	Male	Communication, Information storage, Entertainment ( movies , music), Education	Disagree	Disagree	Strongly disagree	Strongly disagree	Strongly disagree	Strongly disagree	Disagree	Neutral	Disagree	Disagree	Disagree	Neutral	Disagree	Disagree	Neutral	Agree	Disagree	Agree	Disagree	Disagree	Disagree	Disagree	Disagree	Disagree	Disagree
4	Male	Entertainment ( movies , music)	Strongly disagree	Strongly disagree	Neutral	Agree	Agree	Strongly agree	Neutral	Disagree	Agree	Agree	Agree	Strongly disagree	Disagree	Disagree	Agree	Strongly disagree	Strongly disagree	Neutral	Strongly disagree	Agree	Strongly disagree	Agree	Strongly disagree	Agree	Disagree
4	Male	Communication, Information storage, Entertainment ( movies , music), Games, Education	Agree	Disagree	Agree	Agree	Disagree	Disagree	Agree	Agree	Disagree	Disagree	Disagree	Agree	Disagree	Disagree	Agree	Agree	Disagree	Agree	Disagree	Disagree	Disagree	Disagree	Disagree	Agree	Neutral
4	Female	Communication	Agree	Neutral	Neutral	Disagree	Neutral	Neutral	Strongly agree	Agree	Disagree	Neutral	Neutral	Strongly disagree	Strongly disagree	Strongly disagree	Neutral	Agree	Neutral	Neutral	Disagree	Neutral	Disagree	Neutral	Strongly disagree	Disagree	Neutral
1	Male	Communication, Information storage, Entertainment ( movies , music), Education	Disagree	Disagree	Disagree	Strongly disagree	Disagree	Strongly disagree	Disagree	Neutral	Disagree	Strongly disagree	Disagree	Disagree	Disagree	Disagree	Strongly disagree	Disagree	Disagree	Disagree	Disagree	Disagree	Disagree	Disagree	Neutral	Disagree	Disagree
1	Female	Communication, Information storage, Entertainment ( movies , music), Games, Education	Agree	Agree	Agree	Neutral	Agree	Agree	Neutral	Agree	Neutral	Disagree	Disagree	Disagree	Strongly disagree	Strongly disagree	Strongly disagree	Disagree	Disagree	Disagree	Disagree	Neutral	Strongly disagree	Neutral	Disagree	Neutral	Disagree
1	Female	Communication, Entertainment ( movies , music), Education	Disagree	Disagree	Agree	Disagree	Neutral	Neutral	Agree	Agree	Neutral	Agree	Agree	Disagree	Agree	Agree	Disagree	Disagree	Disagree	Agree	Agree	Disagree	Disagree	Agree	Strongly disagree	Neutral	Disagree
1	Female	Information storage	Disagree	Agree	Agree	Disagree	Disagree	Disagree	Agree	Agree	Disagree	Disagree	Disagree	Agree	Disagree	Disagree	Disagree	Agree	Disagree	Agree	Disagree	Disagree	Disagree	Agree	Agree	Agree	Disagree
1	Female	Information storage	Agree	Neutral	Agree	Agree	Neutral	Agree	Agree	Agree	Agree	Agree	Disagree	Disagree	Disagree	Strongly disagree	Neutral	Neutral	Neutral	Agree	Disagree	Neutral	Agree	Agree	Agree	Neutral	Agree
1	Female	Communication, Information storage, Entertainment ( movies , music), Games, Education	Neutral	Disagree	Agree	Disagree	Disagree	Neutral	Disagree	Agree	Disagree	Strongly agree	Agree	Agree	Disagree	Strongly disagree	Disagree	Neutral	Neutral	Agree	Agree	Neutral	Disagree	Neutral	Disagree	Disagree	Neutral
1	Female	Information storage	Agree	Neutral	Agree	Neutral	Neutral	Agree	Neutral	Agree	Agree	Agree	Neutral	Disagree	Disagree	Strongly disagree	Disagree	Neutral	Neutral	Neutral	Disagree	Disagree	Neutral	Disagree	Agree	Agree	Agree
1	Female	Communication, Information storage, Entertainment ( movies , music), Education	Agree	Agree	Neutral	Disagree	Neutral	Agree	Disagree	Agree	Strongly disagree	Strongly disagree	Strongly disagree	Neutral	Strongly agree	Strongly disagree	Strongly disagree	Agree	Agree	Agree	Neutral	Neutral	Agree	Disagree	Disagree	Disagree	Agree
1	Female	Information storage	Agree	Agree	Agree	Disagree	Disagree	Disagree	Agree	Agree	Disagree	Disagree	Disagree	Agree	Disagree	Disagree	Agree	Agree	Disagree	Agree	Disagree	Disagree	Agree	Agree	Agree	Agree	Disagree
1	Female	Education	Strongly agree	Strongly agree	Strongly agree	Strongly agree	Strongly agree	Strongly agree	Strongly agree	Strongly agree	Strongly agree	Neutral	Neutral	Disagree	Strongly agree	Strongly disagree	Strongly disagree	Strongly agree	Disagree	Disagree	Disagree	Disagree	Strongly disagree	Disagree	Strongly agree	Strongly agree	Strongly agree
1	Female	Education	Agree	Disagree	Disagree	Disagree	Agree	Disagree	Agree	Agree	Disagree	Agree	Disagree	Agree	Disagree	Disagree	Agree	Agree	Disagree	Disagree	Disagree	Disagree	Disagree	Disagree	Disagree	Disagree	Agree
1	Female	Information storage	Disagree	Agree	Disagree	Disagree	Agree	Neutral	Disagree	Agree	Disagree	Disagree	Disagree	Agree	Disagree	Disagree	Disagree	Strongly agree	Disagree	Disagree	Disagree	Disagree	Disagree	Disagree	Disagree	Disagree	Agree
1	Female	Communication, Information storage	Neutral	Agree	Agree	Agree	Agree	Neutral	Disagree	Agree	Disagree	Disagree	Disagree	Disagree	Disagree	Disagree	Disagree	Agree	Disagree	Neutral	Strongly disagree	Strongly disagree	Disagree	Disagree	Agree	Neutral	Agree
1	Male	Communication, Information storage	Disagree	Neutral	Neutral	Neutral	Agree	Neutral	Neutral	Disagree	Agree	Neutral	Neutral	Neutral	Neutral	Neutral	Neutral	Neutral	Disagree	Agree	Disagree	Neutral	Neutral	Neutral	Neutral	Neutral	Neutral
1	Male	Communication, Information storage, Education, social media	Disagree	Agree	Neutral	Disagree	Strongly disagree	Disagree	Neutral	Agree	Disagree	Agree	Agree	Disagree	Disagree	Agree	Agree	Disagree	Disagree	Disagree	Strongly disagree	Disagree	Agree	Neutral	Disagree	Agree	Neutral
1	Male	Communication, Information storage, Entertainment ( movies , music), Games, Education	Agree	Agree	Agree	Agree	Disagree	Disagree	Agree	Agree	Disagree	Disagree	Disagree	Disagree	Disagree	Disagree	Disagree	Agree	Disagree	Agree	Disagree	Disagree	Disagree	Disagree	Disagree	Agree	Disagree
1	Male	Communication, Information storage, Entertainment ( movies , music), Games, Education	Agree	Disagree	Agree	Disagree	Disagree	Disagree	Agree	Agree	Disagree	Disagree	Disagree	Disagree	Disagree	Disagree	Disagree	Neutral	Disagree	Disagree	Disagree	Disagree	Disagree	Agree	Disagree	Disagree	Neutral
1	Male	Communication, Information storage, Education, Any other	Disagree	Neutral	Disagree	Disagree	Disagree	Disagree	Agree	Agree	Disagree	Agree	Neutral	Disagree	Agree	Agree	Disagree	Disagree	Disagree	Neutral	Disagree	Disagree	Disagree	Disagree	Disagree	Neutral	Neutral
1	Female	Communication	Neutral	Agree	Agree	Agree	Agree	Agree	Agree	Agree	Agree	Agree	Agree	Agree	Agree	Agree	Agree	Neutral	Neutral	Agree	Agree	Strongly agree	Agree	Agree	Agree	Agree	Agree
1	Male	Education	Disagree	Strongly disagree	Disagree	Strongly disagree	Strongly disagree	Strongly disagree	Disagree	Agree	Neutral	Strongly agree	Strongly disagree	Disagree	Disagree	Strongly disagree	Disagree	Strongly disagree	Strongly disagree	Disagree	Strongly disagree	Disagree	Disagree	Strongly disagree	Strongly disagree	Neutral	Neutral
1	Female	Information storage	Neutral	Neutral	Neutral	Agree	Neutral	Disagree	Neutral	Agree	Neutral	Disagree	Disagree	Agree	Disagree	Agree	Disagree	Neutral	Disagree	Neutral	Strongly disagree	Disagree	Strongly disagree	Neutral	Strongly disagree	Neutral	Agree
1	Female	Communication, Information storage, Entertainment ( movies , music), Games, Education	Disagree	Disagree	Neutral	Disagree	Disagree	Neutral	Disagree	Neutral	Disagree	Agree	Agree	Neutral	Disagree	Strongly disagree	Disagree	Neutral	Neutral	Neutral	Neutral	Neutral	Disagree	Neutral	Neutral	Disagree	Neutral
1	Female	Communication, Entertainment ( movies , music), Education	Neutral	Disagree	Agree	Agree	Disagree	Agree	Neutral	Agree	Agree	Strongly disagree	Disagree	Strongly disagree	Disagree	Strongly disagree	Strongly disagree	Agree	Disagree	Disagree	Disagree	Disagree	Strongly disagree	Disagree	Strongly disagree	Disagree	Disagree
1	Male	All of above options	Disagree	Disagree	Neutral	Neutral	Neutral	Neutral	Neutral	Agree	Agree	Neutral	Neutral	Agree	Disagree	Neutral	Disagree	Agree	Disagree	Neutral	Disagree	Disagree	Disagree	Agree	Disagree	Neutral	Neutral
1	Male	Communication, Information storage, Entertainment ( movies , music), Games, Education, Any other	Agree	Neutral	Disagree	Strongly disagree	Disagree	Agree	Neutral	Agree	Agree	Disagree	Disagree	Disagree	Disagree	Disagree	Agree	Agree	Neutral	Disagree	Neutral	Neutral	Agree	Agree	Strongly disagree	Disagree	Agree
1	Male	Communication, Entertainment ( movies , music)	Agree	Disagree	Agree	Agree	Agree	Agree	Agree	Agree	Disagree	Agree	Agree	Neutral	Disagree	Disagree	Disagree	Agree	Disagree	Disagree	Disagree	Disagree	Disagree	Agree	Neutral	Agree	Agree
1	Female	Education	Neutral	Disagree	Agree	Disagree	Agree	Disagree	Disagree	Disagree	Disagree	Disagree	Disagree	Neutral	Disagree	Disagree	Disagree	Disagree	Disagree	Disagree	Disagree	Disagree	Disagree	Agree	Disagree	Disagree	Disagree
1	Male	Entertainment ( movies , music), Games, Any other,	Strongly disagree	Strongly agree	Agree	Agree	Agree	Agree	Agree	Agree	Agree	Agree	Agree	Agree	Strongly disagree	Strongly disagree	Agree	Agree	Agree	Agree	Strongly disagree	Strongly disagree	Agree	Agree	Agree	Agree	Agree
2	Male	Communication, Information storage, Entertainment ( movies , music), Games, Education	Strongly agree	Agree	Disagree	Agree	Agree	Strongly agree	Agree	Neutral	Strongly agree	Strongly disagree	Disagree	Strongly disagree	Neutral	Disagree	Agree	Neutral	Neutral	Neutral	Neutral	Neutral	Neutral	Neutral	Neutral	Neutral	Neutral
2	Female	Communication, Information storage, Entertainment ( movies , music), Games, Education, Any other	Agree	Agree	Strongly agree	Neutral	Disagree	Agree	Disagree	Strongly agree	Disagree	Disagree	Disagree	Agree	Disagree	Strongly disagree	Disagree	Neutral	Disagree	Strongly disagree	Strongly disagree	Strongly disagree	Strongly disagree	Strongly agree	Strongly disagree	Disagree	Agree
2	Female	Communication	Strongly agree	Agree	Agree	Agree	Agree	Agree	Agree	Strongly agree	Agree	Agree	Agree	Agree	Agree	Disagree	Disagree	Agree	Neutral	Agree	Disagree	Agree	Disagree	Agree	Disagree	Neutral	Agree
2	Female	Communication	Strongly agree	Agree	Agree	Agree	Agree	Agree	Agree	Strongly agree	Agree	Agree	Agree	Agree	Agree	Disagree	Disagree	Agree	Neutral	Agree	Neutral	Neutral	Disagree	Agree	Disagree	Neutral	Agree
2	Female	Communication, Information storage	Disagree	Neutral	Agree	Disagree	Disagree	Disagree	Disagree	Agree	Disagree	Disagree	Disagree	Agree	Disagree	Strongly disagree	Disagree	Disagree	Disagree	Disagree	Disagree	Disagree	Strongly disagree	Agree	Neutral	Disagree	Disagree
1	Female	Education	Agree	Agree	Neutral	Agree	Agree	Agree	Neutral	Agree	Neutral	Agree	Strongly agree	Strongly agree	Strongly disagree	Strongly disagree	Neutral	Strongly agree	Neutral	Strongly agree	Agree	Neutral	Agree	Strongly agree	Disagree	Agree	Strongly agree
1	Female	Entertainment ( movies , music), Any other, shopping	Agree	Disagree	Neutral	Agree	Strongly disagree	Disagree	Disagree	Agree	Disagree	Agree	Disagree	Disagree	Agree	Strongly disagree	Agree	Neutral	Strongly disagree	Disagree	Disagree	Disagree	Neutral	Strongly agree	Strongly disagree	Disagree	Neutral
1	Male	Information storage	Disagree	Neutral	Disagree	Strongly disagree	Disagree	Strongly disagree	Agree	Agree	Agree	Disagree	Agree	Neutral	Agree	Disagree	Strongly agree	Agree	Agree	Neutral	Disagree	Strongly agree	Neutral	Agree	Disagree	Strongly agree	Agree
1	Female	Communication, Information storage, Entertainment ( movies , music), Games, Education	Agree	Strongly disagree	Strongly agree	Disagree	Neutral	Neutral	Disagree	Neutral	Disagree	Strongly disagree	Strongly disagree	Disagree	Disagree	Strongly disagree	Strongly disagree	Agree	Strongly disagree	Strongly disagree	Strongly disagree	Strongly disagree	Disagree	Disagree	Agree	Agree	Neutral
1	Female	Communication, Information storage, Education	Disagree	Disagree	Agree	Agree	Agree	Agree	Agree	Agree	Disagree	Strongly disagree	Neutral	Strongly agree	Agree	Neutral	Neutral	Agree	Disagree	Disagree	Disagree	Disagree	Agree	Agree	Agree	Neutral	Agree
1	Female	Communication	Disagree	Disagree	Disagree	Disagree	Disagree	Disagree	Disagree	Disagree	Disagree	Disagree	Disagree	Disagree	Disagree	Disagree	Disagree	Disagree	Strongly disagree	Strongly disagree	Strongly disagree	Strongly disagree	Strongly disagree	Strongly disagree	Strongly disagree	Agree	Strongly disagree
1	Male	Entertainment ( movies , music)	Strongly disagree	Agree	Strongly disagree	Agree	Agree	Disagree	Neutral	Neutral	Neutral	Disagree	Strongly disagree	Agree	Disagree	Disagree	Disagree	Agree	Strongly agree	Disagree	Agree	Neutral	Strongly disagree	Neutral	Neutral	Neutral	Agree
1	Female	Communication, Information storage, Entertainment ( movies , music), Education	Agree	Strongly agree	Agree	Disagree	Disagree	Agree	Strongly agree	Strongly agree	Strongly disagree	Agree	Disagree	Disagree	Disagree	Strongly disagree	Disagree	Disagree	Disagree	Strongly disagree	Disagree	Disagree	Disagree	Agree	Strongly disagree	Disagree	Strongly agree
1	Female	Communication, Entertainment ( movies , music), Education	Disagree	Disagree	Agree	Agree	Agree	Agree	Disagree	Agree	Disagree	Disagree	Disagree	Agree	Disagree	Disagree	Disagree	Agree	Disagree	Disagree	Disagree	Disagree	Disagree	Agree	Agree	Disagree	Agree
1	Female	Communication, Information storage, Entertainment ( movies , music), Education	Agree	Disagree	Agree	Agree	Agree	Disagree	Neutral	Agree	Disagree	Neutral	Disagree	Agree	Disagree	Disagree	Disagree	Agree	Disagree	Disagree	Disagree	Disagree	Disagree	Agree	Disagree	Disagree	Agree
1	Female	Communication, Entertainment ( movies , music), Education	Neutral	Disagree	Agree	Disagree	Agree	Strongly disagree	Neutral	Agree	Disagree	Agree	Agree	Agree	Disagree	Disagree	Strongly agree	Neutral	Disagree	Disagree	Disagree	Disagree	Agree	Agree	Disagree	Agree	Agree
1	Female	Communication, Information storage, Entertainment ( movies , music), Games, Education	Agree	Disagree	Agree	Disagree	Disagree	Neutral	Neutral	Agree	Neutral	Agree	Disagree	Agree	Neutral	Strongly disagree	Strongly disagree	Agree	Neutral	Neutral	Agree	Strongly disagree	Strongly disagree	Disagree	Neutral	Neutral	Strongly disagree
1	Female	Education	Neutral	Agree	Neutral	Strongly disagree	Disagree	Disagree	Disagree	Neutral	Neutral	Disagree	Disagree	Disagree	Strongly disagree	Strongly disagree	Disagree	Agree	Strongly disagree	Strongly disagree	Strongly disagree	Disagree	Disagree	Disagree	Strongly disagree	Disagree	Neutral
3	Female	Communication, Information storage, Entertainment ( movies , music), Games, Education	Agree	Disagree	Agree	Agree	Agree	Agree	Agree	Agree	Disagree	Agree	Agree	Agree	Disagree	Disagree	Agree	Disagree	Disagree	Agree	Disagree	Disagree	Agree	Agree	Disagree	Agree	Agree
3	Female	Information storage	Strongly disagree	Neutral	Neutral	Neutral	Neutral	Agree	Neutral	Neutral	Neutral	Neutral	Neutral	Disagree	Disagree	Disagree	Neutral	Agree	Agree	Strongly agree	Agree	Disagree	Disagree	Disagree	Disagree	Neutral	Neutral
3	Female	Information storage	Strongly disagree	Strongly disagree	Strongly disagree	Strongly disagree	Strongly disagree	Strongly disagree	Strongly disagree	Strongly disagree	Strongly disagree	Strongly disagree	Strongly disagree	Strongly disagree	Strongly disagree	Strongly disagree	Strongly disagree	Strongly disagree	Strongly disagree	Strongly disagree	Disagree	Strongly disagree	Disagree	Strongly disagree	Strongly disagree	Disagree	Disagree
3	Male	Communication, Information storage, Entertainment ( movies , music), Games, Education	Agree	Disagree	Agree	Disagree	Disagree	Neutral	Agree	Agree	Disagree	Disagree	Disagree	Disagree	Disagree	Disagree	Disagree	Neutral	Disagree	Agree	Disagree	Disagree	Disagree	Agree	Disagree	Agree	Neutral
3	Female	Education	Disagree	Disagree	Neutral	Agree	Disagree	Disagree	Disagree	Agree	Disagree	Disagree	Disagree	Disagree	Disagree	Strongly disagree	Strongly disagree	Strongly disagree	Strongly disagree	Strongly disagree	Strongly disagree	Strongly disagree	Strongly disagree	Strongly disagree	Strongly disagree	Agree	Agree
3	Female	Information storage	Agree	Agree	Disagree	Disagree	Agree	Agree	Neutral	Agree	Neutral	Disagree	Strongly disagree	Disagree	Disagree	Strongly disagree	Neutral	Neutral	Agree	Agree	Neutral	Disagree	Neutral	Agree	Disagree	Agree	Neutral
3	Female	Communication, Information storage, Entertainment ( movies , music), Games, Education	Agree	Agree	Agree	Agree	Agree	Agree	Agree	Agree	Agree	Agree	Agree	Agree	Disagree	Disagree	Agree	Disagree	Disagree	Agree	Disagree	Disagree	Agree	Agree	Disagree	Agree	Agree
3	Male	Communication, Information storage, Entertainment ( movies , music), Education	Agree	Neutral	Agree	Agree	Agree	Agree	Agree	Strongly agree	Disagree	Neutral	Disagree	Disagree	Disagree	Disagree	Disagree	Agree	Disagree	Neutral	Neutral	Neutral	Disagree	Disagree	Disagree	Neutral	Strongly agree
3	Female	Communication	Agree	Disagree	Agree	Disagree	Agree	Disagree	Neutral	Agree	Agree	Disagree	Agree	Agree	Agree	Strongly disagree	Disagree	Agree	Disagree	Agree	Disagree	Strongly disagree	Disagree	Agree	Neutral	Disagree	Agree
3	Female	Communication, Information storage, Entertainment ( movies , music), Games, Education	Agree	Agree	Agree	Agree	Agree	Agree	Agree	Agree	Agree	Agree	Agree	Agree	Disagree	Disagree	Agree	Agree	Disagree	Agree	Disagree	Disagree	Agree	Agree	Disagree	Agree	Agree
3	Female	Information storage	Neutral	Disagree	Agree	Agree	Neutral	Agree	Disagree	Strongly agree	Disagree	Neutral	Neutral	Neutral	Disagree	Disagree	Disagree	Agree	Agree	Agree	Disagree	Disagree	Neutral	Agree	Neutral	Neutral	Disagree
3	Male	Information storage	Strongly disagree	Agree	Agree	Agree	Agree	Agree	Agree	Strongly agree	Strongly agree	Strongly agree	Strongly disagree	Strongly agree	Neutral	Agree	Strongly agree	Strongly disagree	Strongly agree	Agree	Agree	Neutral	Agree	Agree	Strongly disagree	Strongly agree	Strongly disagree
3	Female	Information storage	Disagree	Neutral	Neutral	Disagree	Disagree	Agree	Agree	Strongly agree	Neutral	Disagree	Disagree	Strongly disagree	Disagree	Strongly disagree	Neutral	Neutral	Disagree	Agree	Agree	Neutral	Agree	Agree	Disagree	Agree	Neutral
3	Female	Communication	Agree	Agree	Agree	Agree	Agree	Agree	Agree	Agree	Agree	Agree	Agree	Agree	Agree	Agree	Agree	Agree	Agree	Agree	Agree	Agree	Neutral	Neutral	Disagree	Agree	Agree
3	Female	Education	Disagree	Disagree	Disagree	Neutral	Neutral	Neutral	Neutral	Disagree	Disagree	Agree	Neutral	Agree	Disagree	Disagree	Disagree	Neutral	Disagree	Agree	Disagree	Disagree	Disagree	Neutral	Agree	Neutral	Neutral
3	Female	Communication	Agree	Disagree	Agree	Disagree	Agree	Agree	Agree	Agree	Agree	Agree	Agree	Agree	Agree	Disagree	Agree	Agree	Agree	Disagree	Agree	Agree	Agree	Agree	Disagree	Agree	Disagree
3	Female	Education	Agree	Disagree	Neutral	Disagree	Neutral	Neutral	Neutral	Neutral	Disagree	Agree	Disagree	Neutral	Disagree	Strongly disagree	Disagree	Neutral	Disagree	Neutral	Disagree	Neutral	Disagree	Disagree	Agree	Neutral	Neutral
3	Female	Information storage	Strongly disagree	Strongly disagree	Strongly disagree	Strongly disagree	Strongly disagree	Strongly disagree	Strongly disagree	Strongly disagree	Strongly disagree	Strongly disagree	Disagree	Disagree	Disagree	Disagree	Disagree	Disagree	Disagree	Disagree	Disagree	Disagree	Disagree	Disagree	Disagree	Disagree	Disagree
3	Female	Education	Disagree	Neutral	Neutral	Disagree	Disagree	Disagree	Neutral	Neutral	Disagree	Neutral	Disagree	Neutral	Disagree	Strongly disagree	Disagree	Neutral	Neutral	Neutral	Disagree	Disagree	Disagree	Disagree	Agree	Neutral	Neutral
3	Female	Information storage	Strongly disagree	Strongly disagree	Strongly disagree	Strongly disagree	Strongly disagree	Strongly disagree	Strongly disagree	Strongly disagree	Strongly disagree	Strongly disagree	Strongly disagree	Strongly disagree	Strongly disagree	Strongly disagree	Strongly disagree	Strongly disagree	Strongly disagree	Strongly disagree	Strongly disagree	Strongly disagree	Strongly disagree	Strongly disagree	Strongly disagree	Strongly disagree	Strongly disagree
3	Male	Communication, Information storage, Entertainment ( movies , music), Games, Education, Any other	Agree	Disagree	Agree	Disagree	Neutral	Neutral	Agree	Agree	Disagree	Disagree	Disagree	Neutral	Disagree	Disagree	Disagree	Disagree	Disagree	Neutral	Disagree	Disagree	Disagree	Disagree	Disagree	Agree	Disagree
3	Female	Communication, Information storage, Entertainment ( movies , music), Games, Education	Agree	Disagree	Strongly agree	Disagree	Neutral	Neutral	Neutral	Neutral	Disagree	Neutral	Disagree	Disagree	Strongly disagree	Strongly disagree	Strongly disagree	Strongly disagree	Strongly disagree	Strongly disagree	Strongly disagree	Strongly disagree	Strongly disagree	Disagree	Disagree	Neutral	Disagree
3	Female	Information storage	Neutral	Neutral	Agree	Neutral	Neutral	Neutral	Neutral	Agree	Agree	Neutral	Neutral	Agree	Agree	Neutral	Agree	Agree	Neutral	Neutral	Neutral	Neutral	Agree	Agree	Agree	Agree	Agree
3	Female	Information storage	Agree	Agree	Neutral	Neutral	Neutral	Agree	Agree	Agree	Strongly disagree	Strongly disagree	Disagree	Strongly disagree	Disagree	Strongly disagree	Neutral	Agree	Strongly disagree	Neutral	Strongly disagree	Strongly disagree	Neutral	Agree	Disagree	Agree	Neutral
2	Male	Communication, Information storage, Entertainment ( movies , music), Education	Strongly agree	Strongly agree	Strongly agree	Disagree	Strongly agree	Neutral	Strongly agree	Disagree	Strongly disagree	Strongly agree	Strongly agree	Strongly agree	Neutral	Strongly agree	Strongly agree	Strongly agree	Strongly agree	Strongly disagree	Agree	Disagree	Strongly agree	Strongly agree	Strongly agree	Strongly agree	Strongly agree
2	Male	Information storage	Strongly disagree	Strongly disagree	Strongly disagree	Strongly disagree	Strongly disagree	Strongly disagree	Strongly disagree	Strongly disagree	Strongly disagree	Strongly disagree	Strongly disagree	Strongly disagree	Strongly disagree	Strongly disagree	Strongly disagree	Strongly disagree	Strongly disagree	Strongly disagree	Strongly disagree	Strongly disagree	Strongly disagree	Strongly disagree	Strongly disagree	Strongly disagree	Strongly disagree
2	Male	Information storage	Strongly disagree	Strongly disagree	Strongly disagree	Strongly disagree	Strongly disagree	Strongly disagree	Strongly disagree	Strongly disagree	Strongly disagree	Strongly disagree	Strongly disagree	Strongly disagree	Strongly disagree	Strongly disagree	Strongly disagree	Strongly disagree	Strongly disagree	Strongly disagree	Strongly disagree	Strongly disagree	Strongly disagree	Strongly disagree	Strongly disagree	Strongly disagree	Strongly disagree
2	Female	Communication, Information storage, Education	Agree	Disagree	Disagree	Agree	Strongly agree	Neutral	Neutral	Agree	Strongly disagree	Neutral	Agree	Disagree	Strongly disagree	Strongly disagree	Agree	Agree	Disagree	Agree	Disagree	Disagree	Neutral	Agree	Agree	Neutral	Neutral
2	Male	Communication, Information storage, Entertainment ( movies , music), Education	Agree	Agree	Agree	Disagree	Strongly disagree	Strongly disagree	Agree	Agree	Disagree	Strongly disagree	Disagree	Neutral	Neutral	Strongly disagree	Strongly disagree	Agree	Agree	Strongly disagree	Agree	Strongly disagree	Strongly disagree	Neutral	Disagree	Agree	Strongly disagree
4	Male	Communication, Information storage, Entertainment ( movies , music), Education	Agree	Agree	Agree	Neutral	Neutral	Neutral	Neutral	Neutral	Agree	Agree	Agree	Neutral	Agree	Neutral	Agree	Agree	Disagree	Neutral	Disagree	Disagree	Agree	Agree	Neutral	Neutral	Neutral
4	Female	Communication, Information storage, Education	Strongly agree	Agree	Agree	Neutral	Neutral	Neutral	Neutral	Neutral	Neutral	Disagree	Strongly disagree	Strongly disagree	Disagree	Strongly disagree	Disagree	Neutral	Strongly disagree	Strongly disagree	Strongly disagree	Strongly disagree	Strongly disagree	Neutral	Neutral	Neutral	Strongly disagree
4	Male	Communication, Information storage, Entertainment ( movies , music), Games, Education	Disagree	Neutral	Disagree	Disagree	Disagree	Disagree	Disagree	Disagree	Disagree	Disagree	Disagree	Disagree	Disagree	Disagree	Disagree	Disagree	Disagree	Disagree	Disagree	Disagree	Disagree	Strongly agree	Disagree	Disagree	Disagree
4	Male	Communication, Information storage, Entertainment ( movies , music), Games, Education	Neutral	Agree	Strongly agree	Disagree	Neutral	Agree	Agree	Strongly agree	Disagree	Agree	Neutral	Neutral	Disagree	Strongly disagree	Strongly disagree	Neutral	Strongly disagree	Disagree	Strongly disagree	Strongly disagree	Strongly disagree	Agree	Disagree	Agree	Agree
4	Female	Communication, Information storage, Entertainment ( movies , music), Education	Neutral	Disagree	Agree	Disagree	Disagree	Disagree	Disagree	Disagree	Disagree	Strongly agree	Agree	Strongly agree	Strongly disagree	Disagree	Strongly agree	Disagree	Agree	Agree	Neutral	Neutral	Strongly agree	Strongly disagree	Neutral	Agree	Agree
5	Male	Communication	Strongly disagree	Agree	Disagree	Strongly disagree	Strongly disagree	Strongly disagree	Disagree	Agree	Strongly disagree	Strongly disagree	Strongly disagree	Disagree	Strongly disagree	Strongly disagree	Strongly disagree	Agree	Disagree	Agree	Strongly disagree	Strongly disagree	Strongly disagree	Agree	Agree	Strongly disagree	Strongly disagree
2	Female	Communication, Information storage, Entertainment ( movies , music), Education	Neutral	Agree	Neutral	Neutral	Disagree	Neutral	Disagree	Agree	Disagree	Disagree	Disagree	Neutral	Disagree	Strongly disagree	Disagree	Disagree	Neutral	Disagree	Neutral	Disagree	Disagree	Neutral	Disagree	Neutral	Disagree
2	Female	Communication, Information storage, Entertainment ( movies , music), Games, Education	Agree	Disagree	Strongly agree	Disagree	Agree	Agree	Disagree	Disagree	Agree	Disagree	Disagree	Strongly disagree	Neutral	Strongly disagree	Neutral	Strongly disagree	Strongly disagree	Strongly disagree	Strongly disagree	Disagree	Disagree	Agree	Strongly disagree	Neutral	Agree
2	Female	Information storage	Disagree	Disagree	Disagree	Disagree	Neutral	Strongly disagree	Strongly disagree	Neutral	Disagree	Disagree	Disagree	Neutral	Disagree	Strongly disagree	Disagree	Neutral	Disagree	Disagree	Agree	Disagree	Disagree	Agree	Agree	Strongly disagree	Neutral
2	Female	Education	Neutral	Disagree	Agree	Disagree	Agree	Disagree	Disagree	Disagree	Disagree	Disagree	Disagree	Neutral	Disagree	Disagree	Disagree	Disagree	Disagree	Disagree	Disagree	Disagree	Disagree	Agree	Disagree	Disagree	Disagree
2	Male	Entertainment ( movies , music), Games, Any other,	Strongly disagree	Strongly agree	Agree	Agree	Agree	Agree	Agree	Agree	Agree	Agree	Agree	Agree	Strongly disagree	Strongly disagree	Agree	Agree	Agree	Agree	Strongly disagree	Strongly disagree	Agree	Agree	Agree	Agree	Agree
2	Male	Communication, Information storage, Entertainment ( movies , music), Games, Education	Strongly agree	Agree	Disagree	Agree	Agree	Strongly agree	Agree	Neutral	Strongly agree	Strongly disagree	Disagree	Strongly disagree	Neutral	Disagree	Agree	Neutral	Neutral	Neutral	Neutral	Neutral	Neutral	Neutral	Neutral	Neutral	Neutral
2	Female	Communication, Information storage, Entertainment ( movies , music), Games, Education, Any other	Agree	Agree	Strongly agree	Neutral	Disagree	Agree	Disagree	Strongly agree	Disagree	Disagree	Disagree	Agree	Disagree	Strongly disagree	Disagree	Neutral	Disagree	Strongly disagree	Strongly disagree	Strongly disagree	Strongly disagree	Strongly agree	Strongly disagree	Disagree	Agree
2	Female	Communication	Strongly agree	Agree	Agree	Agree	Agree	Agree	Agree	Strongly agree	Agree	Agree	Agree	Agree	Agree	Disagree	Disagree	Agree	Neutral	Agree	Disagree	Agree	Disagree	Agree	Disagree	Neutral	Agree
2	Female	Communication	Strongly agree	Agree	Agree	Agree	Agree	Agree	Agree	Strongly agree	Agree	Agree	Agree	Agree	Agree	Disagree	Disagree	Agree	Neutral	Agree	Neutral	Neutral	Disagree	Agree	Disagree	Neutral	Agree
2	Female	Communication, Information storage	Disagree	Neutral	Agree	Disagree	Disagree	Disagree	Disagree	Agree	Disagree	Disagree	Disagree	Agree	Disagree	Strongly disagree	Disagree	Disagree	Disagree	Disagree	Disagree	Disagree	Strongly disagree	Agree	Neutral	Disagree	Disagree

## Sheet: Breakup for Venn
Gender	Select the follwoing ways you use mobile	Count of Gender
Female	Information storage	36
	Communication	30
	Communication, Information storage, Entertainment ( movies , music), Games, Education	28
	Education	26
	Communication, Information storage, Entertainment ( movies , music), Education	22
	Communication, Entertainment ( movies , music), Education	12
	Communication, Information storage, Education	8
	Communication, Information storage	6
	Communication, Information storage, Entertainment ( movies , music), Games, Education, Any other	4
	Communication, Information storage, Games, Education	2
	Entertainment ( movies , music), Games, Education	2
	Entertainment ( movies , music)	2
	Entertainment ( movies , music), Any other, shopping	2
Female Total		180
Male	Communication, Information storage, Entertainment ( movies , music), Games, Education	20
	Communication, Information storage, Entertainment ( movies , music), Education	12
	Information storage	10
	Communication	8
	Communication, Information storage, Entertainment ( movies , music), Games, Education, Any other	8
	Entertainment ( movies , music)	8
	Entertainment ( movies , music), Games, Any other,	4
	Education	2
	Communication, Entertainment ( movies , music)	2
	Communication, Information storage	2
	Communication,	2
	Communication, Information storage, Education, Any other	2
	All of above options	2
	Communication, Information storage, Education, social media	2
Male Total		84
Grand Total		264

## Sheet: Class wise distrubution
Your class	Count of Your class
1	82
5	52
3	48
4	42
2	40
Grand Total	264
